# 1     **A Deep Learning approach predicts the impact of point mutations in** 2     **intronic flanking regions on micro-exon splicing definition**

3     **Lucas F. DaSilva<sup>1,2,#,¶</sup>, Ana C. Tahira<sup>1,¶</sup>, Vinicius Mesel<sup>1</sup> and Sergio Verjovski-Almeida<sup>1,2\*</sup>**

4     <sup>1</sup> Laboratório de Expressão Gênica em Eucariotos, Instituto Butantan, São Paulo, SP, Brazil

5     <sup>2</sup> Departamento de Bioquímica, Instituto de Química, Universidade de São Paulo, São Paulo, SP,  
6     Brazil

7     \* **Correspondence:**

8     Sergio Verjovski-Almeida

9     [verjo@iq.usp.br](mailto:verjo@iq.usp.br)

10    <sup>#a</sup> Current address: Sylvester Comprehensive Cancer Center, University of Miami Miller School of  
11    Medicine, Miami, Florida, USA

12    <sup>¶</sup>These authors have contributed equally to this work

13    **Keywords: micro-exon splicing, Convolutional Neural Network (CNN), deep learning, in silico**  
14    **point mutation screening, micro-exon splicing prediction, predictive conserved base**  
15    **identification, intron sequence conservation, enriched RNA-binding-motifs.**

## 16    **Abstract**

17    While mammalian exons are on average 140-nt-long, thousands of human genes harbor micro-exons  
18    ( $\leq 39$  nt). Large numbers of micro-exons have their splicing altered in diseases such as autism and  
19    cancer, and yet there is no systematic assessment of the impact of point mutations in intronic  
20    flanking-sequences on the splicing of a neighboring micro-exon. Here, we constructed a model using  
21    the Convolutional Neural Network (CNN) to predict the impact of point mutations in intronic-  
22    flanking-sequences on the splicing of a neighboring micro-exon. The prediction model was based on  
23    both the sequence contents and conservation among species of the two 100-nt intronic regions (5'  
24    and 3') that flank all human micro-exons and a set with the same number of randomly selected long  
25    exons. After training our CNN model, the micro-exon splicing event prediction accuracy, using an  
26    independent validation dataset, was 0.71 with an area under the ROC curve of 0.76, showing that our  
27    model had identified sequence patterns that have been conserved in evolution in the introns that flank  
28    micro-exons. Next, we introduced *in silico* point mutations at each of the 200 nucleotides in the  
29    introns that flank a micro-exon and used the trained CNN algorithm to predict splicing for every  
30    mutated intronic sequence version. This analysis identified thousands of point mutations in the  
31    flanking introns that significantly decreased the power of the CNN model to correctly predict a  
32    neighboring micro-exon splicing event, thus pointing to predictive bases in intronic regions important  
33    for micro-exon splicing signaling. We found these predictive bases to locate within conserved RNA-  
34    binding-motifs for RNA-binding-proteins (RBPs) known to relate to micro-exon splicing.  
35    Experimental data of minigene splicing reporter changes upon intron-base point-mutation confirmed  
36    the effect predicted by the CNN model for some of the micro-exon splicing events. The model can be  
37    used for validating novel micro-exons *de novo* assembled from RNA-seq data, and for an unbiased  
38    screening of introns, identifying genomic bases that have high micro-exon-splicing predictive power,  
39    possibly revealing critical point mutations that would be related in a yet unknown manner to a given  
40    disease.

## 41 1 Introduction

42 In eukaryotes, splicing events in pre-mRNAs from several mature transcripts culminate in the  
43 production of multiple protein isoforms produced from the same gene structure. These splicing  
44 events involve very precise and specific mechanisms which add another layer of complexity in gene  
45 regulation (Pan et al., 2008). About 90-95% of multi-exon genes are estimated to have alternative  
46 splicing isoforms, affecting the variability of expression between cells and tissues (Wang et al.,  
47 2008), and modifying cell localization and abundance of various protein isoforms that alter gene  
48 regulation of the cell (Gallego-Paez et al., 2017). In order to be a dynamic and well-orchestrated  
49 mechanism, several factors influence the splicing process such as spliceosome formation,  
50 involvement of RNA-binding proteins (RBPs) and participation of regulatory sequences such as  
51 intronic splicing enhancers/silencers (ISE/ISS) and exonic splicing enhancers/silencers (ESE/ESS),  
52 among others (Wang et al., 2015). Several studies have already pointed to altered splicing events in  
53 genes transcribed in cancer or neuropsychiatric diseases (Wang and Cooper, 2007; Suñé-Pou et al.,  
54 2017), for example in prostate cancer, where 30 % of the studied genes had only differences in their  
55 spliced isoforms and not in expression levels, showing the relevance of splicing regulation in  
56 functional biological processes. Thus, understanding the regulatory events in splicing can point out  
57 important aspects associated with the diseases.

58 Advances in large-scale technologies have pointed to a new class of exons, the so-called  
59 micro-exons, which were originally defined as exons which range in length up to 25 nucleotides (nt)  
60 (Volfovsky et al., 2003). Mammalian exons are on average 140-nt long (Gelfman et al., 2012), and  
61 the conventional splicing machinery has a predilection for exons with an average 140-nt length  
62 (Schwartz et al., 2009). Nevertheless, thousands of human genes have micro-exons (Li et al., 2015;  
63 Tapial et al., 2017), which are especially expressed in neuronal tissues at different stages (Yan et al.,  
64 2015). In invertebrates, we have shown that the *Schistosoma mansoni* parasite has over a dozen  
65 different micro-exon gene (MEG) families (DeMarco et al., 2010); each MEG has from 4 up to 19  
66 micro-exons that generate protein variation through the alternate splicing of short ( $\leq 36$  nt)  
67 symmetric exons organized in tandem (DeMarco et al., 2010). More recently, micro-exons were  
68 defined as exons with lengths  $\leq 51$  nt (Li et al., 2015). Given their short length, micro-exons would  
69 not accommodate large numbers of exonic splicing enhancers/silencers, requiring that these  
70 regulatory elements be primarily located in the introns that flank these micro-exons. Li *et al.* (Li et  
71 al., 2015) have shown that, in mammals, the conservation of bases in introns that flank micro-exons  
72 is greater than the conservation of introns that flank non-micro-exons. Another documented feature is  
73 the differential distribution of certain 6-base motifs (k-mers) in the intronic regions that flank micro-  
74 exons (Ustianenko et al., 2017). In addition, these short motifs are co-localized with some RNA  
75 binding proteins such as RBFOX and PTBP1, as evidenced by CLIP-seq assays with brain tissues  
76 and HeLa cells (Li et al., 2015). Silencing and overexpression assays for nSR100 protein showed a  
77 large effect on the mechanism of micro-exon splicing in 293T kidney cells (Irimia et al., 2014). In  
78 that study, Irimia *et al.* (Irimia et al., 2014) identified 126 micro-exon splicing events altered in the  
79 brain of autistic patients compared with controls, corresponding to 30 % of all micro-exon splicing  
80 events in that tissue.

81 The above set of information suggests that there might be specific mechanisms that define  
82 micro-exon splicing, but these mechanisms are still not fully explored. In fact, up until now most  
83 machine learning algorithms have searched for patterns in splicing events in general, such as  
84 SpliceAI (Jaganathan et al., 2019), not specifically looking for patterns involved with micro-exon  
85 splicing events.

86 Here, we performed a detailed computational search of patterns that could enable the splicing  
87 machinery to operate on micro-exons using a Convolution Neural Network (CNN) deep learning  
88 approach (Angermueller et al., 2016). More important, we have combined the CNN deep learning  
89 approach with an *in silico* point mutation strategy that scans the intronic sequences that flank micro-  
90 exons, in search for critically conserved bases where point mutations can be predicted to negatively  
91 impact the splicing of a neighboring micro-exon. Identification of such conserved intronic patterns  
92 involving micro-exon splicing extends the knowledge about the factors that control micro-exon  
93 splicing events in normal cells. It also opens the way for future large-scale screening of rare point  
94 mutations in the human genome that can change the intronic conserved patterns and would be  
95 predicted to impair processing of flanking micro-exons. Such an approach could accelerate the  
96 identification of intronic mutations that lead to micro-exon splicing defects yet unknown to be related  
97 with disease states.

## 98 2 Materials and Methods

### 99 2.1 Convolution Neural Network (CNN)

100 In order to train a classifier that could distinguish micro-exons ( $\leq 39$  nt) from long exons ( $> 39$  nt),  
101 all 4,908 micro-exons annotated in the human genome assembly (hg38) with the Ensembl annotation  
102 (GRch38.76) were identified; in order to have a balanced CNN model, an equal number of 4,908  
103 randomly selected long exons was identified. For each selected exon, the 100-nt sequence from the  
104 intronic region upstream of the exon 5'-end and the 100-nt intronic sequence downstream of the 3'-  
105 end were extracted. To provide information to the classifier about conservation in the regions that  
106 flank micro-exons and long exons, the conservation score in vertebrates (PhastCon100way) for each  
107 nucleotide in the two 100 bp intronic regions that flank each of the selected exons was obtained.

108 The sequences  $s$  that flank each of the exons were transformed into categorical variables with  
109 the help of a *one-hot encoder* [A: (0,0,0,1) C: (0,0,1,0) T: (0,1,0,0) G: (1,0,0,0)] and the conservation  
110 values  $c$  were maintained as a continuous variable ranging from 0 to 1.

111 These data were used to train a Deep Convolutional Neural Network (CNN) with 1D  
112 convolutions from 4 different inputs. Inputs can be described as:

$$113 \quad INPUT_{upstream\_sequence} = [s_{u-1}, s_{u-2}, \dots, s_{u-100}] \quad (1)$$

$$114 \quad INPUT_{upstream\_conservation} = [c_{u-1}, c_{u-2}, \dots, c_{u-100}] \quad (2)$$

$$115 \quad INPUT_{downstream\_sequence} = [s_{d+1}, s_{d+2}, \dots, s_{d+100}] \quad (3)$$

$$116 \quad INPUT_{downstream\_conservation} = [c_{d+1}, c_{d+2}, \dots, c_{d+100}] \quad (4)$$

117 Where  $u$  represents the genomic coordinate of the 5' end of an exon (either a micro-exon or a  
118 long exon) and  $d$  the genomic coordinate of the 3' end of the same exon.  $s$  and  $c$  represent  
119 respectively the vector containing the *one-hot encoder* and the nucleotide conservation value of a  
120 given coordinate in the flanking intron related to that exon.

121 The model was trained using binary crossentropy as the loss function, learning rate = 0.001,  
122 decay = 0.0 and optimized with rmsprop. The final dataset contained 7,067 exons for training (3,534  
123 micro-exons and 3,533 long exons), and another 1,767 exons were used for validation (883 micro-

124 exons and 884 long exons), while the remaining 982 sequences were used to assemble the ROC  
125 curves (491 micro-exons and 491 long exons).

126 Training was performed during 4000 epochs using a 500-size batch. The selected model was  
127 the one that obtained the highest accuracy in the validation data during the training. The analyzes  
128 were performed with keras (Chollet) in python 2.7.

## 129 2.2 *In silico* mutations

130 For each base within a 100-nt intronic region that flanks a micro-exon under analysis, with a given  
131 genomic coordinate, a *PositionScore* value was generated that corresponds to the importance of a  
132 given intronic nucleotide  $n$  for the prediction of the nearby micro-exon given the trained model.  
133 Calculation of the value per  $n$  position can be obtained as follows:

$$134 \quad \textit{PositionScore} = \sum_{i=1}^{i=3} p(n_b) - p(n_i) \quad (5)$$

135 Where, variable  $b$  represents the nucleotide base found in the original sequence and variable  $i$   
136 represents one of the 3 other possible nucleotides. The  $p$  function is the prediction value of the micro-  
137 exon by the trained CNN model given all the original parameters of the intron that flanks a micro-  
138 exon, or after nucleotide  $n_b$  is replaced by nucleotide  $n_i$  at the given position. The final *PositionScore*  
139 value of a given  $n$  position in any intron that flanks a micro-exon was determined by the sum of the  
140 differences between the original base prediction value and the artificially mutated base prediction  
141 values.

142 All possible positions (100 upstream and 100 downstream) in the introns that flank all 4,908  
143 micro-exons had their *PositionScore* calculated. After that, the *PositionScores* with negative and  
144 positive values were normalized by the *PositionScore* with the lowest, most negative and the highest,  
145 most positive values, respectively, sorted from the lowest, most negative to the highest, most positive  
146 score, and the genomic coordinates of the positions having the top 5 % *PositionScores* with the most  
147 negative values were annotated.

## 148 2.3 Base Group Evaluation

149 The top 5 % intron bases that had the greatest negative influence on micro-exon prediction (most  
150 negative *PositionScore* values) were divided into five different groups, each group having the same  
151 number of intron bases but with different *PositionScore* values. GroupA represents the top 1 %  
152 quantile with the most negative *PositionScore* values and GroupE the lowest of the top five 1 %  
153 quantiles. The distance measurements between the intron bases and the 5'-end and 3'-end of the exon  
154 were obtained using BEDTools (v2.26.0) (Quinlan and Hall, 2010), and comparisons of the  
155 distributions were performed with Kolmogorov-Smirnov test. Density distributions of distances from  
156 bases to the 5'- or 3'-end were obtained with ggplot2. Kendall's rank correlation test was used to  
157 obtain the correlation between the absolute *PositionScore* values of the bases and the distances. For  
158 interspecies conservation all PhastCon data (Siepel et al., 2005; Pollard et al., 2010) for primates,  
159 placentals, and vertebrates were used (PhastCon7way, and PhastCon100way). Conservation scores  
160 were compared using the Kolmogorov-Smirnov (KS) test calculated with R (R Core Development  
161 Team, 2013).

## 162 2.4 Motif analyses



163 In silico analyses of the RNA-binding-motifs were performed using the MEME program (v. 4.12.0)  
164 (Bailey et al., 2009). All bases in the intronic regions that were identified by the machine learning  
165 (ML) algorithm as having negative influence on micro-exon prediction were extended by 5 nt at both  
166 ends (5' and 3'), resulting in an 11-nt-long sequence; for this, the respective genomic sequences were  
167 retrieved from ENSEMBL (hg38) assembly ([ftp://ftp.ensembl.org/pub/release-](ftp://ftp.ensembl.org/pub/release-96/fasta/homo_sapiens/dna/Homo_sapiens.GRCh_38.dna_sm.primary_assembly.fa.gz)  
168 [96/fasta/homo\\_sapiens/dna/Homo\\_sapiens.GRCh\\_38.dna\\_sm.primary\\_assembly.fa.gz](ftp://ftp.ensembl.org/pub/release-96/fasta/homo_sapiens/dna/Homo_sapiens.GRCh_38.dna_sm.primary_assembly.fa.gz)) using  
169 getfasta from BEDTools tool (v2.26.0) (Quinlan and Hall, 2010) according to the strand orientation  
170 of the transcript. MEME (Bailey et al., 2006) was used to identify the 3 most hyper-represented 11-  
171 nt-long sequences in each of the five groups (GroupA to GroupE, see above) in a non-biased way  
172 using a zero-order probability model; only single nucleotide frequencies would be measured without  
173 di- or tri-nucleotides. To build the zero-order probability model, the 100-nt-long upstream and  
174 downstream intronic sequences that flank long exons (> 39 nt) (n = 4,417 exons, 8,834 intronic  
175 flanking sequences, model: A = 0.246, C = 0.215, G = 0.222, T = 0.317) were scanned using the 11-  
176 nt-long sequences. The parameters used for this analysis were: zoops (Zero or One Occurrence Per  
177 Sequence), number of motifs identified = 3, and the window size representing the motif size was 6 to  
178 8 nt. Only motifs with E-value  $\leq 0.05$  were considered for further analyses.

## 179 **2.5 Motif identification**

180 Motif identification was performed using the TomTom similarity algorithm (Gupta et al., 2007). The  
181 enriched motifs identified in the previous analysis were used as query sequences and the targets were  
182 the sequences that are deposited in the ATtRACT Database (Giudice et al., 2016). This database  
183 compiles information on 370 RBPs and 1583 RBP consensus RNA-binding-motifs; only human  
184 genome sequences were used, resulting in 1,094 consensus sequences. The similarity matrix used  
185 was the Euclidean distance, which has a higher accuracy rate when compared with other functions  
186 (Gupta et al., 2007). Only sequences that had similarities with E-value  $\leq 0.05$  were selected for  
187 further analysis. Sequence data representing intronic splicing enhancers / silencers (ISE/ISS) were  
188 used as targets in an additional search for similarity. Intronic Splicing Enhancers (ISE) sequences  
189 were obtained from the study by Wang et al. (Wang et al., 2012) represented by 109 sequences. To  
190 reduce redundancy only the main clusters were used, representing six consensus sequences  
191 (GGGTTT, GGTGGT, TTTGGG, GAGGGG, GGTATT and GTAACG). Sequences referring to ISS  
192 (Intronic Splicing Silencers) were obtained from the study by Wang et al. (Wang et al., 2013b)  
193 represented by 102 sequences. The same strategy was used to avoid redundancy, and only the main  
194 groupings were used as the target sequence, resulting in 10 consensus sequences (CACACCA,  
195 CTCCTC, UACAGCT, CTTTAC, GAACAG, CAAAGGA, AGATATT, ACATGA, AATTTA and  
196 AGTAGG).

## 197 **2.6 Motif enrichment**

198 Motif enrichment analysis was performed using the CentriMo algorithm (Bailey and MacHanick,  
199 2012). Only data from the RBP sites identified in the similarity analysis (Motif identification, see  
200 above) was used in each analysis to reduce the multiple testing rate. As a negative control, sequences  
201 of intronic regions (100 nt) from the long exon model were used to calculate enrichment in a 6 to 8 nt  
202 window, with all other default parameters. First, the algorithm uses a 6- to 8-nt window to identify  
203 motifs along the given intronic sequence and calculate the significance of enrichment at a specific  
204 location, given by a p-value, which was corrected for multiple testing and represented by E-value.  
205 After this step, the frequency of similar sequences in the data of interest was calculated and compared  
206 with the negative control sequences, the significance of the difference between expected and  
207 observed was given by the result of the Fischer test adjusted for multiple testing. To perform this

208 analysis, the sequences were divided into upstream and downstream from exonic and micro-exonic  
209 regions, due to the fact that some binding sites were enriched in upstream regions and not  
210 downstream and vice versa.

## 211 **2.7 Gene Ontology (GO) enrichment analysis**

212 GO enrichment analysis was performed with Webgestalt (Wang et al., 2013a) using over  
213 representation analysis (ORA) with at least 3 genes and as background all cataloged human proteins.  
214 False Discovery Rate (FDR)  $\leq 0.05$ .

## 215 **2.8 eCLIP assay data**

216 eCLIP-seq data was downloaded from the ENCODE project portal (Davis et al., 2018) at  
217 (<https://www.encodeproject.org>). Data from K562 and HepG2 cell lines, for **PTBP1** (ENCFF051PIE,  
218 ENCFF245YUN, ENCFF363UDO, ENCFF936SHU, ENCFF476HFB, ENCFF556EQK,  
219 ENCFF258TKH, ENCFF617YCT, ENCFF799AHI, ENCFF967LWB, ENCFF207EDD,  
220 ENCFF665CYG), **TIA1** (ENCFF093IND, ENCFF873ZAY, ENCFF782ZMF, ENCFF940BFP,  
221 ENCFF951BGZ, ENCFF573VNX, ENCFF996GFV, ENCFF306MBI, ENCFF048JJS,  
222 ENCFF625OCH, ENCFF523SWX, ENCFF698IQD) and **U2AF2** (ENCFF368XEI, ENCFF159SPZ,  
223 ENCFF536AFD, ENCFF913WRH, ENCFF566CFJ, ENCFF989JBA, ENCFF765TAB,  
224 ENCFF712LBW, ENCFF524JHH, ENCFF024JFG, ENCFF945AJC, ENCFF126CZT) RBPs were  
225 used. Data for eCLIP-seq (Van Nostrand et al., 2016) in bigWig format was obtained, both for the  
226 target proteins of interest and their respective controls (mock IgG). The files were converted to wig  
227 using the UCSC tools (Kent et al., 2010). The raw signal from wig files were represented by signal+1  
228 in order to be more stringent to small values and avoid 0 division. The median signal of each assay  
229 was calculated for each of the groups and for the long exons negative control and divided by the  
230 signal of the respective mock control.

## 231 **2.9 RBP knock down (KD)**

232 RNA-seq data in HepG2 and K562 cells for knock down of *PTBP1* (ENCFF001ZGD,  
233 ENCFF001ZGF, ENCFF001ZGI, ENCFF001ZGJ, ENCFF184CDV, ENCFF456OPJ,  
234 ENCFF486ADH, ENCFF555EDL, ENCFF642KBO, ENCFF887GOE, ENCFF893AGN,  
235 ENCFF983TGB), for knock down of *U2AF2* (ENCFF158ZML, ENCFF593VXV, ENCFF550GXB,  
236 ENCFF424URS, ENCFF470BBN, ENCFF235FRZ, ENCFF026PLZ, ENCFF824GIZ,  
237 ENCFF020XNK, ENCFF229BQW, ENCFF298TSM, ENCFF354AMD), for knock down of *TIA1*  
238 (ENCFF741EQA, ENCFF578TWY, ENCFF695YNR, ENCFF338TUE, ENCFF773CAF,  
239 ENCFF647VRD, ENCFF228TQK, ENCFF845KED) and for controls (ENCFF385GEX,  
240 ENCFF403CZA, ENCFF278TEH, ENCFF922CDR, ENCFF910EGI, ENCFF430ZBY,  
241 ENCFF291QQH, ENCFF503VRZ, ENCFF105YHI, ENCFF602GIQ) were obtained from the  
242 ENCODE project portal (Davis et al., 2018) at (<https://www.encodeproject.org>), and the data is  
243 described in (Nostrand et al., 2018). Reads were quality checked with FastQC (v0.11.7) (Andrews,  
244 2010) and the adapters removed with Fastp (v0.20.0) (Chen et al., 2018). Reads mapping to exon  
245 splice junctions and differential abundance analyses were performed using vast-tools (v2.2.2)  
246 (<https://github.com/vastgroup/vast-tools#vast-tools-1>) and the human genome assembly (hg19). The  
247 database used contains 402,157 reference splicing events described in the Vertebrate Alternative  
248 Splicing and Transcription Database (VastDB) (Tapial et al., 2017) for the human genome; VastDB  
249 is one of the largest resource of genome-wide, quantitative profiles of AS events assembled to date.  
250 The vast-tools use Bowtie (Langmead, 2010) for genome mapping; first, reads were divided into 50-

251 nt over a 25-nt window, after this process the reads that have not been mapped to the genome were  
252 used for mapping at known exon splice junctions, and for *de novo* junctions a model was built where  
253 the 5'- and 3'-end of the same exon needed to be less than 300 nt apart and the junction must have had  
254 the canonical splice site donor/acceptor GU/AG (Irimia et al., 2014).

## 255 **2.10 SDVs dataset**

256 The Multiplexed Functional Assay of Splicing using Sort-seq (MFASS) dataset that has been  
257 generated to determine splice-disrupting variants (SDVs) was downloaded from the work by Cheung  
258 *et al* (Cheung et al., 2019) and compared with the list of introns that flank micro-exons identified in  
259 our CNN model. There were 27,733 rare variants from the ExAC database assayed by MFASS and  
260 1,050 classified as SDVs (Cheung et al., 2019). Comparisons were performed using BEDTools tool  
261 (v2.26.0) (Quinlan and Hall, 2010) with the intersect function with -f 1 -r parameters. All  
262 comparisons were performed using hg38 assembly coordinates.

## 263 **3 Results**

### 264 **3.1 Prediction of splicing of micro-exons with the Convolutional Neural Network algorithm** 265 **using primary sequence and conservation score among vertebrates**

266 In order to determine whether the pattern of bases conservation in introns interferes with micro-exon  
267 splicing events in humans, we constructed a prediction deep learning model using a Convolutional  
268 Neural Network (CNN) (Figure 1A), which was based on both the sequence content of the 100-nt-  
269 long intronic regions that flank micro-exons and long exons at their 5'- and 3'-ends, and the sequence  
270 conservation among the species of these 100-nt-long intronic sequences (Figure 1A). Conservation  
271 score values for the human genome bases obtained by comparison with 100 vertebrate genomic  
272 sequences (Siepel et al., 2005, 2006) were used to obtain the conservation level of intronic regions  
273 that flank the micro-exons and long exons (+100 bases downstream to exons and -100 bases  
274 upstream to exons).

275 These values were then used to assess the conservation of introns that flank micro-exons of  
276 different lengths. We observed that introns that flank symmetrical micro-exons (micro-exons whose  
277 lengths were an exact multiple of 3) were more conserved than introns that flank non-symmetrical  
278 micro-exons (Figure 1B, see peaks at 3, 6, 9 nt, etc.). This difference in intronic conservation as a  
279 function of micro-exon length was no longer noted for introns that flank micro-exons over 39 nt in  
280 length (Figure 1B). Using the conservation information of Figure 1B, we decided to train our CNN  
281 model (Figure 1A) using introns that flank micro-exons only of lengths  $\leq 39$  nt. This choice assumes  
282 that the elements that are recognized by the splicing machinery were conserved during evolution in  
283 the intronic regions that flank the micro-exons.

284 To train the CNN model, we retrieved all 4,908 micro-exons of lengths  $\leq 39$  nt that were  
285 present in the Ensembl annotation (GRch38.76) of the hg38 version of the human genome, and  
286 randomly divided the set in three parts: 10 % (491 micro-exons) were set aside for the final test of  
287 performance of the model; of the remaining 4,417 micro-exons, 80 % were used for training the  
288 model (3,534 micro-exons), while 20 % (883 micro-exons) were used for an independent validation  
289 of the trained model. In order to have a balanced CNN model, an equal number of 4,908 randomly  
290 selected long exons ( $> 39$  nt) was used.

291 The CNN model was trained with the set of 7,067 intronic 100-nt-long sequences that flanked  
292 the 3,534 micro-exons, both upstream of the micro-exon 5'-end and downstream of the 3'-end. An

293 equal amount of 7,067 intronic 100-nt-long sequences that flanked 3,534 long exons on both ends  
294 was also used for training. With the trained CNN model, a micro-exon prediction accuracy of 0.71  
295 was obtained for a validation test with an independent dataset of 1,766 intronic regions, and the area  
296 under the ROC curve was 0.76 (Figure 1C).

297 As a parallel control, we tested the performance of the CNN model only using the intronic  
298 sequences, without the conservation scores; after training without the conservation, the best obtained  
299 micro-exon prediction accuracy was only 0.59 for the validation test with the independent dataset,  
300 and the area under the ROC curve was 0.61. Given the low performance of this sequence-only model,  
301 we did not explore it further.

302 The observation that a good prediction accuracy was obtained with the complete CNN model,  
303 using both the sequences and their conservation scores, reinforces the idea that our machine learning  
304 approach was finding a pattern in flanking introns that has been conserved in evolution, and that  
305 should participate in micro-exon processing events.

### 306 **3.2 *In silico* point mutations in the introns that flank micro-exons affected the splicing** 307 **predictive power of the CNN model**

308 Next, we introduced *in silico* point mutations, one at a time, at each of the 200 nucleotides that flank  
309 the micro-exons or long exons, replacing the original base with each of the 3 other bases, and the  
310 CNN trained algorithm was used to predict splicing for every mutated intronic sequence version. The  
311 objective of this strategy was to estimate to what extent the conservation at each position along the  
312 intron interfered with the CNN model classification of the nearby micro-exon or long exon splicing  
313 event. The difference in the predictive value obtained before and after the *in silico* point mutation of  
314 each base was summarized with the *PositionScore* value for the respective base, as described in the  
315 Methods.

316 A heatmap of *PositionScore* values along the introns that flank all tested micro-exons was  
317 generated (Figure 2), with the micro-exons being clustered according to the pattern of *PositionScores*  
318 across their flanking introns. The heatmap shows that when each original base was *in silico* mutated,  
319 being replaced by each of the other 3 bases, negative and positive *PositionScore* values were  
320 obtained for many of the bases along the introns that flank each micro-exon (Figure 2). This indicates  
321 that the micro-exon-splicing prediction power of the CNN model was altered by the resulting *in*  
322 *silico* mutated intron, compared with the original intron sequence. Bases with negative  
323 *PositionScores* (Figure 2, blue regions) indicate that a given point mutation had a negative impact on  
324 the prediction power, i.e. the mutation resulted in an increased likelihood that the intronic sequence  
325 were mistakenly classified by the model to be an intron that flanks a long exon (Figure 2). These data  
326 highlight conserved sequences in the flanking introns important for micro-exon splicing signaling.  
327 The red points in the map (Figure 2) show that when *in silico* point mutations were introduced at  
328 certain points in the introns, there was an increased likelihood of those sequences being recognized  
329 by the CNN model as introns that flank micro-exons. This could be due to the fact that, for that given  
330 intron, the power of the CNN model classification might have been near the significance cutoff when  
331 the wild-type sequence was considered, while in the *in silico* mutated sequence the change in a base  
332 in the red region has possibly changed its sequence pattern towards a more robust, conserved pattern  
333 of introns that flank micro-exons.

### 334 **3.3 Different density distribution of predictive *PositionScore* values for bases in the introns** 335 **that flank micro-exons**



336 To show that the machine learning approach was pointing to a sequence pattern conserved during  
337 evolution, the *PositionScores* were compared with PhastCon conservation scores across different  
338 species. First, the predictive bases were grouped according to the value of the *PositionScore*, in the  
339 following way. Bases were ordered according to the values of *PositionScore*, from the lowest, most  
340 negative to the highest, most positive. Bases with the lowest, most negative *PositionScores* represent  
341 nucleotides with the greatest negative impact on micro-exon-splicing predictive value. In total,  
342 23,704 bases were pooled, originating from analysis of the introns that flank all 4,417 micro-exons;  
343 these 23,704 bases represent the top 5 % with the lowest, most negative *PositionScores* (out of the  
344 474,079 bases with *PositionScores* < 0). The 23,704 bases were divided into five groups, with  
345 GroupA containing the bases with the lowest, most negative *PositionScore* values representing the  
346 top 1 % of the total bases (n = 4,741), and each of the four remaining groups were comprised of n =  
347 4,741 bases (Table 1). The distribution of mean values of absolute *PositionScore* along the five  
348 groups from GroupA to GroupE is shown in Supplementary Figure 1A. The difference in the median  
349 absolute *PositionScore* between GroupA and GroupB was the largest (0.14) (Table 1).

350 Analysis of the distribution of GroupA predictive base positions along the introns that flank  
351 the micro-exons showed predictive bases more densely located at a median distance of 9 nt up- and  
352 downstream from the micro-exon ends (Figure 3A, Table 1), whereas in GroupB the median was 12  
353 nt (Table 1). The average absolute values of *PositionScores* as a function of the distance to the micro-  
354 exon end was computed in 20-nt-long windows along the intron (for all groups A to E together)  
355 (Supplementary Figure 1B). As the distance between predictive base and micro-exon end increases,  
356 the absolute values of *PositionScore* along the intron decrease (Kendall's rank correlation, tau = -  
357 0.23, p-value < 2.2e-16, Supplementary Figure 1B). All comparisons between groups showed a  
358 difference in distribution as a function of distance (Supplementary Table S1, Komogorov-Smirnov  
359 test, p-value < 0.05).

360 Since GroupA showed predictive bases closer to the micro-exons and larger absolute values of  
361 *PositionScore*, these bases were expected to be in more evolutionarily conserved regions compared  
362 with the other groups. As expected, in the analysis comparing the PhastCon7way values, which  
363 represent the conservation values among 7 vertebrates, GroupA showed higher conservation values  
364 when compared with the other groups; the cumulative density of the PhastCon7way value for each  
365 group shifted to the left as the group mean absolute *PositionScore* value decreased (Figure 3B). For  
366 GroupA bases the median value of PhastCon7way was 0.247, while in GroupB it was 0.161 (Table  
367 1). All comparisons of PhastCon7way value distributions showed statistical difference (KS test, p-  
368 value < 0.05). The same pattern was observed when other PhastCon Scores background conservation  
369 values for 100 species were used (Supplementary Figure 2 and Supplementary Table S2). A  
370 statistically significant low correlation was observed between *PositionScore* and PhastCon7way  
371 (Spearman Correlation rho = -0.14, p-value < 0.05); it can be seen that higher PhastCon7way Scores  
372 were associated with higher absolute *PositionScore* values (Figure 3C).

### 373 **3.4 Identification of enriched specific sequences shows that the CNN model highlighted a** 374 **homogeneous sequence pattern of predictive bases**

375 To identify possible enriched sequence patterns containing the predictive bases (with the highest  
376 absolute *PositionScores*) within each group, the MEME Suite algorithm (Bailey et al., 2009) was  
377 used. For this purpose, a window was created with the five nucleotides present in the intron genomic  
378 sequence on each side of the predictive base under study, generating a small 11-nt-long sequence  
379 containing the predictive base. To identify over-represented sequences in each group, we contrasted  
380 the frequency of 11-nt-long intron sequences of GroupA with a background model using the base



381 frequency of 11-nt-long windows along the 100-nt-long up- and downstream intronic regions that  
382 flank long exons.

383 In this analysis, the algorithm sought, within the 11-nucleotide sequences, to obtain a multiple  
384 alignment of all sequences from the same group, with at least 6 to 8 nucleotides aligned in each  
385 sequence, to ensure that the predictive base was included within the RNA motif to be found. The  
386 results shown in Table 2 include the 3 most abundant motifs in each group. It is worth noting that  
387 GroupA had more sequences that matched each of the 3 consensus motifs, suggesting that the bases  
388 with the highest absolute *PositionScores* housed more defined patterns. For example, in GroupA the  
389 number of sequences that aligned to generate Motif 1 (UYUYUYYY) was 3,783 (out of 4,741  
390 sequences, 80%), while GroupB Motif 1 (UYUYUYYY) had 3,019 sequences (64 %), and the  
391 number of sequences within the enriched motifs decreased as a function of the lowering of the base  
392 predictive value in the groups (Figure 4A).

393 The two most enriched motifs were very similar among the groups, being comprised of  
394 sequences with high C and U contents or having a G-rich region. The third most enriched motif was  
395 characterized by the presence of a high-C content (Figure 4B). The frequency of predictive base  
396 position within the motif was different among sequences in the same group, and also different when  
397 comparing motifs between groups (Figure 4C), although the identified motifs were very similar  
398 among groups. Thus, Motif 1 in GroupA (Figure 4C) had more predictive bases located at positions 4  
399 and 6, and in GroupB at positions 3 and 6, while in Groups C, D and E, the predictive bases were  
400 located mainly at the sixth position ( $\chi^2$  test, df (12), p-value < 2e-16). Motif 2 in GroupA (Figure 4C)  
401 had more bases located at positions 5 and 6, whereas in GroupB at positions 4 and 5 and in GroupC  
402 at positions 3 and 4 (Figure 4C). GroupD predictive bases (Figure 4C) were located more frequently  
403 at position 6, and in GroupE at positions 3 and 6 ( $\chi^2$  test, df (20), p < 2e-16). Motif 3 showed  
404 predictive bases widespread among positions 3 to 6 (Figure 4C), mostly at position 4 for Groups A, B  
405 and C, position 3 for Group D and position 6 for Group E ( $\chi^2$  test, df (12), p = 4e-6).

### 406 **3.5 Enriched motifs containing the predictive bases identified by CNN were enriched in** 407 **RNA-binding-motifs of RBPs involved with RNA splicing**

408 To test whether the motifs containing the predictive bases were similar to known RBP RNA-binding-  
409 motifs, we used the TomTom algorithm (Gupta et al., 2007) and the sequences were compared with  
410 the ATtRACT database (Giudice et al., 2016). This database is comprised of canonical and non-  
411 canonical RNA consensus sequences that are known binding targets of human RBPs. Searching for  
412 the three most enriched motifs that contained the predictive bases in all groups (A through E), six  
413 RBPs were found in common among the analyzes (Figure 5A, Table 3), namely PTBP1, ELAVL1,  
414 U2AF2, ELAVL2, TIA1 and PCBP1. The PTBP1 (Polypyrimidine Tract Binding Protein 1) motif  
415 was detected in all groups with the highest significance score. GO biological process enrichment  
416 analysis of the six RBPs identified, resulted in 14 significantly enriched GOs (FDR  $\leq$  5%), of which  
417 8 (57%) are for processes involved in splicing (Figure 5B and Supplementary Table S3).

### 418 **3.6 Introns that flank long exons had a different pattern of splicing predictive bases** 419 **distribution and different conserved RNA-binding-motifs**

420 For comparison, similar analyses were performed with *PositionScores* of bases in the introns flanking  
421 long exons (> 39 nt). A heatmap of *PositionScore* values along the introns that flank all tested long  
422 exons was generated (Supplementary Figure 3), with the long exons being clustered according to the  
423 pattern of *PositionScores* across their flanking introns. Analysis of the more abundant motifs in the  
424 intron sequences showed that G and C content or A-rich regions were present (Supplementary Figure

425 4 and Supplementary Table S4), however the number of sequences comprising each of these motifs  
426 was lower than 5 % of total (Figure S4A and Supplementary Table S4), showing that a different  
427 pattern of *PositionScore* distribution was found for predictive bases in the introns that flank long  
428 exons compared with the pattern in the introns that flank micro-exons.

429 When these motifs were compared with the ATtRACT database, we found that the motifs in  
430 the introns flanking the long exons resulted in the identification of fifteen RBPs (Figure S4B), and all  
431 motifs excepted for PCBP1 were different than those identified in the introns flanking the micro-  
432 exons.

### 433 **3.7 Intronic splicing silencer motif was enriched in the introns that flank micro-exons**

434 Other databases interrogating conserved RNA sequences were used to explore whether enriched  
435 sequences containing predictive bases could harbor additional regulatory region patterns. For this,  
436 two other databases were added to the analysis, one for the ISE motifs and one for the ISS. In the ISE  
437 database, none of the consensus sequences found in the introns that flank micro-exons reached the E-  
438 value similarity threshold  $\leq 0.05$ . It is very interesting to note that in the ISS database, the AGUAGG  
439 consensus sequence showed similarity with GroupA Motif 3 (GGRGGAGG, E-value = 0.0175). This  
440 motif had not been identified with statistically significant similarity to any RBP motif, in our  
441 previous analysis with the ATtRACT database.

### 442 **3.8 Motifs containing predictive bases showed occupancy distribution along flanking intronic** 443 **regions similar to the distribution of RBP-binding-motifs and ISSs**

444 In order to investigate whether the RBP motifs identified in the previous analysis were represented at  
445 a specific location in the upstream or downstream (100 nt) intronic regions that flank micro-exons,  
446 the CentriMo tool was used (Bailey and MacHanick, 2012). To perform this analysis, the sequences  
447 were divided into upstream and downstream of the exonic/micro-exonic region, and the significant  
448 enrichment (E-value  $\leq 0.05$ ; Fisher exact-test  $< 0.05$ ) of each RBP motif in the introns that flank  
449 micro-exon compared with the same motifs in the long exon model was calculated and plotted  
450 (Figure 6A). In GroupA, four RBP RNA-binding-motifs were identified as showing significant  
451 enrichment in the upstream region, namely two different PTBP1 motifs, ELAVL1 and U2AF2  
452 (Figure. 6A), while only PTBP1 motif was enriched in the downstream region (Figure. 6A).

453 As expected, degenerate Motif 1 UYUYUYYY, which encompasses PTBP1, ELAVL1 and  
454 U2AF2 motifs, had a distribution along the intronic sequences neighboring the micro-exons (Figure  
455 6A, yellow line) which was similar to the RBP motifs it represents (Figure 6A, blue lines), while  
456 degenerate Motifs 2 and 3 (GGUGAGUS and GGRGGAGG) (Figure 6A, brown lines), which house  
457 G-rich regions, showed a completely distinct distribution along intronic upstream regions that flank  
458 the micro-exons, with enrichment in the region -40 to -100 nt, away from the micro-exon. Similar  
459 patterns of RBP enriched motifs distribution were obtained for all other intronic regions flanking  
460 micro-exons in GroupB to GroupE (Supplementary Figure 5).

461 Next, we performed the distribution analysis of ISS binding motifs along the intronic regions  
462 that flank micro-exons. In GroupA, Motif 3 GGRGGAGG harboring a high G content, showed  
463 similarity with ISS consensus # I (AGUAGG) and the distribution is shown in Supplementary Figure  
464 6. The distribution suggests that enrichment in the region -40 to -100 nt, away from the micro-exon,  
465 was a site for splicing silencers.

### 466 3.9 eCLIP-seq assays evidenced that PTBP1, U2AF2 and TIA1 bind more abundantly to 467 RNA introns that flank micro-exons compared with long exons

468 To confirm the above *in silico* findings with experimental approaches, we analyzed publicly available  
469 experimental eCLIP-seq data for PTPB1, U2AF2 and TIA1, obtained with two cell lines, namely  
470 HepG2 liver carcinoma and K562 leukemia cell lines (Van Nostrand et al., 2016). The density of  
471 reads in the intronic RNA regions that flank the micro-exons or long exons was calculated by the  
472 ratio between the signal abundance obtained with RBP-specific antibody and the signal in the  
473 negative control (mock). In HepG2 liver cells, all three RBPs were found to bind more intensely in  
474 the intronic RNA regions that flank micro-exons of all five groups (GroupA to GroupE) in relation to  
475 those flanking long exons, as shown in Figure 6B to 6D. Interestingly, PTBP1 (Polypyrimidine Tract  
476 Binding Protein 1) showed a higher abundance near the 3' splice site (3'ss) end, in the RNA introns  
477 that flank micro-exons compared with long exons, both upstream (-5 to -50 nt) and downstream of  
478 the micro-exons (+60 to +100 nt) (Figure 6B), while U2AF2 showed higher binding in the RNA  
479 introns flanking micro-exons compared with long exons in the region near the 5'ss end, in the introns  
480 upstream (-100 to -75 nt) and downstream of the micro-exons (+1 to +50 nt) (Figure 6C). Lastly,  
481 TIA1 was bound more abundantly to RNA introns flanking micro-exons both upstream (-50 to -25  
482 nt) and downstream (+25 to +60) of the micro-exon (Figure 6D). Similar patterns were observed in  
483 K562 leukemia cells (Supplementary Figure 7).

### 484 3.10 RBP knock down evidenced that PTBP1 and U2AF2 predominantly affected micro-exons 485 splicing

486 We then looked for possible changes in the splicing patterns of micro-exons that might result from  
487 *PTBP1* or *U2AF2* gene knock down. For this, we have re-analyzed RNA-seq gene expression data  
488 from both K562 and HepG2 cell lines under *PTBP1* or *U2AF2* knock down (Nostrand et al., 2018),  
489 using the vast-tools that is sensitive to alternative splicing events, as described in the Methods.

490 First, the RNA-seq reads of the *PTBP1* silencing assay and its respective control experiment  
491 were mapped to the known splicing junctions in the human genome, and the splicing events detected  
492 in both datasets were quantified. A total of 145,836 and 155,528 splicing events were identified in  
493 K562 and HepG2, respectively, including intronic retention, alternate use of exons and alternate use  
494 of the 3' and 5' splice sites. Then, we calculated the *Percent Spliced-In* (PSI) ratio of isoform  
495 abundances at each junction and kept those with at least  $PSI = 0.15$  between isoforms. The statistical  
496 significance of the difference between the two datasets was calculated using the vast-tools package  
497 approach. A total of 208 splicing events in K562, and 258 in HepG2 were identified with  
498 significantly altered abundance between the samples when *PTBP1* splicing factor was silenced,  
499 compared with the controls. Both analyses showed an enrichment of micro-exon modulation upon  
500 *PTBP1* knock-down. Of 208 splicing events in K562 cells, 20 were micro-exon splicing (8.6%,  
501 Fisher's test p-value  $1.08E-03$ , [OR] = 2.28) and of 258 splicing events in HepG2, 35 were micro-  
502 exon splicing events (12.15 %, Fisher's test p-value  $1.65E-08$ , [OR] = 3.26). Most of the changes  
503 were related to an increased percentage of micro-exon retention, namely 17 (out of 20, or 85 %) in  
504 K562 and 28 (out of 35, or 80 %) in HepG2 when *PTBP1* was silenced (Supplementary Table S5,  
505 Supplementary Figure 8A).

506 Next, in the *U2AF2* silencing assay, a total of 94,568 and 151,369 splicing events were  
507 identified in K562 and HepG2 cells, respectively. A total of 977 splicing events in K562, and 1,005  
508 in HepG2 cells were identified with altered abundance between the samples when *U2AF2* splicing  
509 factor was silenced, compared with the controls. Of these splicing events, 39 were micro-exon  
510 splicing events (4 %, Fisher's test p-value  $3.44 E-01$ , [OR] = 1.08) in K562 cells, and 69 (6 %,

511 Fisher's test p-value  $8.77E-04$ , [OR] = 1.52) in HepG2 cells. Therefore, only in HepG2 cells the  
512 silencing of *U2F2A* showed an enrichment of micro-exon modulation, however in both cell lineage  
513 assays the knock down of *U2AF2* led to an increased exclusion of micro-exons. Thus, 32 micro-  
514 exons (out of 39, or 82 %) were excluded in K562, and 45 (out of 69, or 65 %) were excluded in  
515 HepG2 when *U2AF2* was silenced (Supplementary Figure 8B and Supplementary Table S6).

516 Noteworthy, *TIA1* knock down resulted in modulation of few micro-exons. There were 132,389  
517 and 148,328 splicing events screened in K562 and HepG2, respectively. Of these, 179 splicing events  
518 in K562, and 85 in HepG2 were identified with altered abundance between the samples, compared  
519 with control. Only one (0.4 %, Fisher's test p-value  $9.82 E-01$ , [OR] = 0.25) and 6 (6.4 %, Fisher's  
520 test p-value  $1.75 E-01$ , [OR] = 1.64) splicing events were related to micro-exon modulation in K562  
521 and HepG2, respectively, when *TIA1* was silenced. Thus, for these two cell lines, the knock down of  
522 *TIA1* showed little alteration in micro-exon isoforms.

### 523 **3.11 Silencing *PTBPI* modulates the splicing pattern of dystrophin (*DMD*) gene at micro-exon** 524 **78 (32-nt-long) on chrX:31,126,642-31,126,673**

525 Since knock down of *PTBPI* showed a predominant modulation of micro-exons in both K562 and  
526 HepG2 cell lines, we chose to focus on micro-exon splicing affected by this protein. There were 6  
527 micro-exons that were modulated in common in both cell lines (Supplementary Figure 8A), and one  
528 of these was micro-exon 78 of the *DMD* gene (chrX:31,126,642-31,126,673), a 32-nt-long micro-  
529 exon. *DMD* is the very long gene that encodes dystrophin, in which deletions of one or many exons  
530 cause Duchenne Muscular Dystrophy (OMIM: #310200). The *PositionScores* in the *DMD* intron  
531 with the highest negative impact for the micro-exon model were in the upstream region around - 16  
532 nt to - 22 nt (Figure 7A). In fact, this corresponds to one of the intronic regions where *PTBPI*  
533 binding was found to be enriched in the eCLIP-seq assay (Figure 6B). Knock down of *PTBPI*  
534 resulted in an increase in the isoform that harbors this micro-exon in both HepG2 cells (Figure 7B)  
535 and K562 cells (Supplementary Figure 9). The likelihood of mean differences in PSI when  
536 comparing silencing and control, computed as described by Irimia *et al.* (Irimia *et al.*, 2014) and  
537 Tapial *et al.* (Tapial *et al.*, 2017), was 0.13 (at 95 % confidence) in HepG2 cells (Figure 7B, right  
538 panel), and 0.12 in K562 cells (Supplementary Figure 9, right panel). The higher abundance of reads  
539 mapping to this micro-exon when *PTBPI* was silenced can be clearly observed in Figure 7C, which  
540 shows the RNA-seq reads mapping to this genomic locus in each knock down or control assay, for  
541 the two cell lines.

### 542 **3.12 Multiplexed functional assay of splicing using minigene reporter confirmed that the CNN** 543 **model can discriminate bases important for micro-exon splicing events**

544 In order to highlight our micro-exon prediction CNN model as a tool to point out nucleotide bases  
545 that could affect micro-exon splicing events, we searched the dataset of splice-disrupting variants  
546 (SDVs) provided by the work of Cheung *et al.* (Cheung *et al.*, 2019), which employed the  
547 Multiplexed Functional Assay of Splicing using Sort-seq (MFASS). In this study, Cheung *et al.* used  
548 MFASS to detect splicing event disruption caused by rare genetic variants (Cheung *et al.*, 2019), and  
549 screened for 27,733 exonic and intronic single-nucleotide rare variants identified in the Exome  
550 Aggregation Consortium (ExAC) database. The authors constructed a synthetic oligonucleotides  
551 library that encodes each candidate exon and surrounding intronic sequences with the rare variants  
552 (intronic or exonic), and measured the splicing inclusion/exclusion by cloning the synthetic library  
553 inside a splicing reporter minigene housing the GFP and mCherry, plus the synthetic sequence  
554 flanked by *DHFR* or *SMNI* intron backbone, and integrated the constructs into HEK293T cells using  
555 site-specific single-copy integration. If the synthetic exon were excluded, causing an exon skipping,



556 GFP was expressed, otherwise if the synthetic exon were included the mCherry was expressed  
557 (Cheung et al., 2019). In total, the work identified 1,050 variants (out of 27,733, i.e. 3.8 %) which  
558 were classified as splice-disrupting variants (SDVs) that led to almost complete loss of exon  
559 recognition (Cheung et al., 2019), and 6,469 variants (23 %) that caused alteration of  $\Delta\text{PSI} \geq 0.1$ .

560 Of the 27,733 variants assayed by Cheung *et al.* (Cheung et al., 2019), only 436 were located at  
561 intronic regions of micro-exons, and from these, a total of 27 (6.2 %) were classified as SDVs and  
562 133 (30.5 %) caused a  $\Delta\text{PSI} \geq 0.1$  comparing mutant and wild-type. From these 436 assayed variants,  
563 in the introns that flank micro-exons, we found that 13 correspond to bases that were present in our  
564 list of top 5 % most negative *PositionScore* predictive bases, which would most negatively impact  
565 splicing of the flanking micro-exons. Out of these 13 variants assayed, 2 (15.4 %) were classified as  
566 SDVs, and 6 (46 %) had an alteration of  $\Delta\text{PSI} \geq 0.1$  comparing mutant and wild-type (Supplementary  
567 Figure 10). Extending this analysis to the top 25 % predictive bases detected by our CNN model,  
568 there were 72 bases screened, of which 6 (8.3 %) were classified as SDVs, and 24 (33 %) presented  
569 alteration in  $\Delta\text{PSI} \geq 0.1$  comparing mutant and wild type (Supplementary Figure 10). The rate of  
570 confirmation of SDVs among the events predicted by the CNN model (8.3 to 15.4 %) was similar to  
571 the overall rate of confirmation of SDVs among all assayed rare variants that flank micro-exons (6.2  
572 %) (Cheung et al., 2019). This result shows empirical evidence that the CNN model pointed to a set  
573 of intronic bases important for micro-exon splicing events that were among the set of rare variants  
574 that affect micro-exon splicing, as detected by large-scale screening with a minigene reporter assay.

#### 575 4 Discussion

576 In this work we have built a deep learning model using a CNN architecture to identify  
577 conservation patterns of intronic DNA sequences important for the micro-exon splicing mechanism,  
578 being the first machine learning approach to identify conservation patterns that discriminate micro-  
579 exon splicing from long exons splicing. Deep learning methodologies have been extensively used in  
580 the genomic context (Poplin et al., 2018), because the algorithm can work with high dimensionality  
581 data (input), using layers of spatial abstract features with the combination of multiple kernels, making  
582 it possible to handle highly complex data in a hierarchical way (Angermueller et al., 2016; Jones et  
583 al., 2017). The original approach of our strategy was to use intronic-flanking base conservation  
584 scores among vertebrates combined with *in silico* point mutations of these bases to estimate the  
585 impact of intronic mutations on the neighboring micro-exon-splicing predictive power of a CNN  
586 model. A delta score value was computed, which was summarized into a *PositionScore* per base in  
587 the intron; the largest the absolute *PositionScore* value the higher its impact on the CNN model  
588 predictive power. The micro-exon-splicing prediction accuracy of 0.71 obtained with the trained  
589 CNN model, and the area under the ROC curve of 0.76, indicated that the performance obtained here  
590 was similar to that of other splicing prediction algorithms, such as SpliceRover (Zuallaert et al.,  
591 2018), GeneSplicer (Pertea, 2001) and SpliceAI (Jaganathan et al., 2019), which were focused on  
592 predicting donor and acceptor splice sites. Of note, none of these approaches (Pertea, 2001; Zuallaert  
593 et al., 2018; Jaganathan et al., 2019) did exclusively look for micro-exon splicing patterns.

594 Micro-exon-flanking intron bases with the highest interspecies conservation values and the  
595 smallest, most negative *PositionScore* values were enriched near the micro-exon ends, and the  
596 sequence patterns within these regions did possess similarity to known RNA-binding-motifs of RBPs  
597 known to affect the splicing mechanism. For example PTBP1 (Li et al., 2015) presents splicing  
598 inhibitory properties (Gonatopoulos-Pournatzis et al., 2018) and its silencing in N2A neuroblastoma  
599 cells increased the inclusion of 92 % out of 141 altered micro-exons (Han et al., 2014) and higher  
600 inclusion of a 12-nt micro-exon in the *KDM1A* gene (Xue et al., 2013). Our re-analyses of the RNA-



601 seq data on the effect of *PTBP1*, *U2AF2* and *TIA1* splicing-factor genes knockdown in K562 and  
602 HepG2 cells (Nostrand et al., 2018), evidenced that among the three factors the largest effect of  
603 knockdown was for *PTBP1*, resulting in inclusion of micro-exons due its negative regulatory  
604 function (Gonatopoulos-Pournatzis et al., 2018), while *U2AF2* knockdown resulted in an increase of  
605 micro-exon skipping. *U2AF2* is well characterized to bind to 3' splice enhancer regions  
606 (Graveley et al., 2001), being part of a complex important to bind enhancer of micro-exons (eMIC)  
607 regions (Faraway and Ule, 2019). This protein mediates splicing of Alu elements in antisense  
608 orientation binding to poly-U tracts (Sibley et al., 2016) and is enriched in regions upstream of  
609 alternative micro-exons (Li et al., 2015).

610 Importantly, other RBPs identified in our *in silico* analyses may appear as enriched in  
611 experiments using cell lines other than HepG2 and K562, which were used in the public eCLIP-Seq  
612 (Van Nostrand et al., 2016) and RBP splicing-factors knockdown (Nostrand et al., 2018)  
613 experiments, considering that our *in silico* CNN approach analyzed all the intronic sequences and  
614 their interspecies conservation, irrespective of the expression patterns of different splicing-proteins in  
615 different tissues/lineages.

616 Our deep learning CNN model was able to screen at least four bases with negative  
617 *PositionScores* in the region -16 nt to -22 nt in the intron upstream of micro-exon 78 of *DMD* gene,  
618 indicating that mutations in these bases decreased the likelihood of the intron being correctly  
619 classified as a micro-exon-flanking region. Splicing of micro-exon 78 (32-nt-long) of the *DMD* gene  
620 is an example of a micro-exon splicing event in a human gene involved with a debilitating and lethal  
621 disease, the Duchenne Muscular Dystrophy, which results from mutations that cause splicing errors  
622 (Le Rumeur et al., 2010). The *DMD* gene is the longest gene in the human genome, which spans over  
623 2.2 Mb, with long introns that are processed through non-sequential and multi-splicing steps (Gazzoli  
624 et al., 2016), and in this context the correct mechanism of splicing is essential. Indeed, splicing  
625 defects in the *DMD* gene have been identified as originated from mutations both at canonical sites  
626 and located at less-conserved positions deeply embedded within the large *DMD* introns (Tuffery-  
627 Giraud et al., 2017). Different alternatively spliced isoforms of *DMD* are expressed in diverse tissues  
628 such as skeletal muscle, brain and smooth muscle (Feener et al., 1989). Also, the Dp71 transcript,  
629 encoding a 70-75 kDa C-terminal protein product of the *DMD* gene expressed in the human brain  
630 (Austin et al., 2000), shows several isoforms with alternative C-terminal, including one with exon 78  
631 skipping, which changes the reading frame and modifies the translated C-terminal, producing  
632 dystrophin with a 31 amino acids (aa) tail instead of a shorter 13 aa tail (Austin et al., 2000).  
633 Dysregulation of these splicing isoforms were related to cognitive impairments (Tadayoni et al.,  
634 2012), although the mechanisms of dysregulation are not known. Regarding specifically the isoform  
635 without exon 78, it is expressed in embryonic stages in pre-contractile muscle, and re-expression of  
636 this isoform instead of the adult isoform contributes to progression of the dystrophic process in  
637 myotonic dystrophy type I (Rau et al., 2015). On the other hand, the isoform with exon 78 skipping  
638 is the most expressed in neuronal SH-SY5Y cells (Nishida et al., 2015), while in muscle tissue under  
639 physiological conditions, only 2.5 % of the expressed gene corresponds to this alternative isoform  
640 (Tuffery-Giraud et al., 2017). All this suggests that the correct expression of *DMD* isoforms is under  
641 developmental control and must involve a complex machinery; we speculate that mutations in the  
642 conserved region around bases -16 nt to -22 nt upstream of micro-exon 78 might affect its fine-  
643 tuning splicing regulation.

644 Overall, the deep learning CNN model has pointed to intron bases which had a high predictive  
645 value for micro-exon splicing, and a search for conserved patterns has identified RNA-binding-  
646 motifs of specific RBPs associated with the splicing process. Even more interesting was the finding

647 that the *in silico* motif predictions could be experimentally confirmed with data from e-CLIP RBP  
648 binding assays, from silencing assays of splicing-regulatory proteins, and from splice-disrupting  
649 mutations detected with minigene reporter, thus reinforcing the predictive power of the *in silico*  
650 model. Search for the impact of variants on splicing mechanism has gained attention during the past  
651 years (Li et al., 2016), which resulted from gathering information about sQTL in the human  
652 population (Park et al., 2018) or in disease (Tian et al., 2019); especially considering the noncoding  
653 regions, it is still a challenge to discriminate risk variants outside of exon regions in complex diseases  
654 (Xiao et al., 2017).

655 RNA-seq deep-sequencing has been frequently used to assemble novel transcripts, and the  
656 predictive power of our CNN model could be applied as a tool to validate *de novo* micro-exons  
657 annotation in different tissues or cancer cells.

658 Finally, we propose that the deep learning CNN model developed here could be used in  
659 combination with the full genome sequencing data from patients, in order to perform an unbiased  
660 screening for mutations in the intronic regions of genes, looking for point mutations in bases that  
661 have high impact on micro-exon-splicing predictive power. This approach can possibly reveal critical  
662 point mutations in intronic conserved regions that flank micro-exons that would be related in a yet  
663 unknown manner to a given disease.

## 664 **5 Conflict of Interest**

665 The authors declare that the research was conducted in the absence of any commercial or financial  
666 relationships that could be construed as a potential conflict of interest.

## 667 **6 Author Contributions**

668 LFdS and SVA conceived the work. LFdS, ACT and VM performed the experiments and obtained  
669 the data. LFdS, ACT and SVA analyzed and interpreted the data. LFdS and ACT wrote the first draft  
670 of the manuscript. SVA edited the draft and wrote the final manuscript. All authors read and  
671 approved the final manuscript.

## 672 **7 Funding**

673 This work was supported by the Fundação de Amparo à Pesquisa do Estado de São Paulo (FAPESP)  
674 grant numbers 2014/03620-2 and 2018/23693-5 to SVA. LFdS received a fellowship from Conselho  
675 Nacional de Desenvolvimento Científico e Tecnológico (CNPq). SVA received an established  
676 investigator career award fellowship from CNPq. The laboratory received support from Fundação  
677 Butantan.

## 678 **8 Acknowledgments**

679 We thank Dr. J.C. Setubal for access to the computational facilities of the Bioinformatics Laboratory  
680 of Instituto de Química, Universidade de São Paulo (USP).

681

## 682 **9 References**

- 683 Andrews, S. (2010). FastQC: A quality control tool for high throughput sequence data. Available at:  
684 <http://www.bioinformatics.babraham.ac.uk/projects/fastqc/>.
- 685 Angermueller, C., Pärnamaa, T., Parts, L., and Stegle, O. (2016). Deep learning for computational  
686 biology. *Mol. Syst. Biol.* 12, 878. doi:10.15252/msb.20156651.
- 687 Austin, R. C., Morris, G. E., Howard, P. L., Klamut, H. J., and Ray, P. N. (2000). Expression and  
688 synthesis of alternatively spliced variants of Dp71 in adult human brain. *Neuromuscul. Disord.*  
689 10, 187–193. doi:10.1016/S0960-8966(99)00105-4.
- 690 Bailey, T. L., Boden, M., Buske, F. A., Frith, M., Grant, C. E., Clementi, L., et al. (2009). MEME  
691 SUITE: tools for motif discovery and searching. *Nucleic Acids Res.* 37, W202–W208.  
692 doi:10.1093/nar/gkp335.
- 693 Bailey, T. L., and MacHanick, P. (2012). Inferring direct DNA binding from ChIP-seq. *Nucleic Acids*  
694 *Res.* 40, e128–e128. doi:10.1093/nar/gks433.
- 695 Bailey, T. L., Williams, N., Misleh, C., and Li, W. W. (2006). MEME: discovering and analyzing  
696 DNA and protein sequence motifs. *Nucleic Acids Res.* 34, W369–W373.  
697 doi:10.1093/nar/gkl198.
- 698 Chen, S., Zhou, Y., Chen, Y., and Gu, J. (2018). fastp: an ultra-fast all-in-one FASTQ preprocessor.  
699 *Bioinformatics* 34, i884–i890. doi:10.1093/bioinformatics/bty560.
- 700 Cheung, R., Insigne, K. D., Yao, D., Burghard, C. P., Wang, J., Hsiao, Y. H. E., et al. (2019). A  
701 Multiplexed Assay for Exon Recognition Reveals that an Unappreciated Fraction of Rare  
702 Genetic Variants Cause Large-Effect Splicing Disruptions. *Mol. Cell* 73, 183-194.e8.  
703 doi:10.1016/j.molcel.2018.10.037.
- 704 Chollet, F. Keras: Deep Learning library for Theano and TensorFlow. *GitHub Repos.* Available at:  
705 <https://github.com/keras-team/keras>.
- 706 Davis, C. A., Hitz, B. C., Sloan, C. A., Chan, E. T., Davidson, J. M., Gabdank, I., et al. (2018). The  
707 Encyclopedia of DNA elements (ENCODE): Data portal update. *Nucleic Acids Res.* 46, D794–  
708 D801. doi:10.1093/nar/gkx1081.
- 709 DeMarco, R., Mathieson, W., Manuel, S. J., Dillon, G. P., Curwen, R. S., Ashton, P. D., et al. (2010).  
710 Protein variation in blood-dwelling schistosome worms generated by differential splicing of  
711 micro-exon gene transcripts. *Genome Res.* 20, 1112–1121. doi:10.1101/gr.100099.109.
- 712 Faraway, R., and Ule, J. (2019). The origin of neural microexons. *Nat. Ecol. Evol.* 3, 526–527.  
713 doi:10.1038/s41559-019-0818-1.
- 714 Feener, C. A., Koenig, M., and Kunkel, L. M. (1989). Alternative splicing of human dystrophin  
715 mRNA generates isoforms at the carboxy terminus. *Nature* 338, 509–511.  
716 doi:10.1038/338509a0.
- 717 Gallego-Paez, L. M., Bordone, M. C., Leote, A. C., Saraiva-Agostinho, N., Ascensão-Ferreira, M.,  
718 and Barbosa-Morais, N. L. (2017). Alternative splicing: the pledge, the turn, and the prestige.  
719 *Hum. Genet.* 136, 1015–1042. doi:10.1007/s00439-017-1790-y.

- 720 Gazzoli, I., Pulyakhina, I., Verwey, N. E., Ariyurek, Y., Laros, J. F. J., 't Hoen, P. A. C., et al.  
721 (2016). Non-sequential and multi-step splicing of the dystrophin transcript. *RNA Biol.* 13, 290–  
722 305. doi:10.1080/15476286.2015.1125074.
- 723 Gelfman, S., Burstein, D., Penn, O., Savchenko, A., Amit, M., Schwartz, S., et al. (2012). Changes in  
724 exon-intron structure during vertebrate evolution affect the splicing pattern of exons. *Genome*  
725 *Res.* 22, 35–50. doi:10.1101/gr.119834.110.
- 726 Giudice, G., Sánchez-Cabo, F., Torroja, C., and Lara-Pezzi, E. (2016). ATtRACT—a database of  
727 RNA-binding proteins and associated motifs. *Database* 2016, baw035.  
728 doi:10.1093/database/baw035.
- 729 Gonatopoulos-Pournatzis, T., Wu, M., Braunschweig, U., Roth, J., Han, H., Best, A. J., et al. (2018).  
730 Genome-wide CRISPR-Cas9 Interrogation of Splicing Networks Reveals a Mechanism for  
731 Recognition of Autism-Misregulated Neuronal Microexons. *Mol. Cell* 72, 510-524.e12.  
732 doi:10.1016/j.molcel.2018.10.008.
- 733 Graveley, B. R., Hertel, K. J., and Maniatis, T. O. M. (2001). The role of U2AF35 and U2AF65 in  
734 enhancer-dependent splicing. *RNA* 7, 806–818. doi:10.1017/S1355838201010317.
- 735 Gupta, S., Stamatoyannopoulos, J. A., Bailey, T. L., and Noble, W. S. (2007). Quantifying similarity  
736 between motifs. *Genome Biol.* 8, R24. doi:10.1186/gb-2007-8-2-r24.
- 737 Han, A., Stoilov, P., Linares, A. J., Zhou, Y., Fu, X. D., and Black, D. L. (2014). De Novo Prediction  
738 of PTBP1 Binding and Splicing Targets Reveals Unexpected Features of Its RNA Recognition  
739 and Function. *PLoS Comput. Biol.* 10, e1003442. doi:10.1371/journal.pcbi.1003442.
- 740 Irimia, M., Weatheritt, R. J., Ellis, J. D., Parikshak, N. N., Gonatopoulos-Pournatzis, T., Babor, M.,  
741 et al. (2014). A highly conserved program of neuronal microexons is misregulated in autistic  
742 brains. *Cell* 159, 1511–1523. doi:10.1016/j.cell.2014.11.035.
- 743 Jaganathan, K., Kyriazopoulou Panagiotopoulou, S., McRae, J. F., Darbandi, S. F., Knowles, D., Li,  
744 Y. I., et al. (2019). Predicting Splicing from Primary Sequence with Deep Learning. *Cell* 176,  
745 535-548.e24. doi:10.1016/j.cell.2018.12.015.
- 746 Jones, W., Alasoo, K., Fishman, D., and Parts, L. (2017). Computational biology: deep learning.  
747 *Emerg. Top. Life Sci.* 1, 257–274. doi:10.1042/etls20160025.
- 748 Kent, W. J., Zweig, A. S., Barber, G., Hinrichs, A. S., and Karolchik, D. (2010). BigWig and  
749 BigBed: Enabling browsing of large distributed datasets. *Bioinformatics* 26, 2204–2207.  
750 doi:10.1093/bioinformatics/btq351.
- 751 Langmead, B. (2010). Aligning short sequencing reads with Bowtie. *Curr. Protoc. Bioinforma.*  
752 Chapter 11, Unit 11.7. doi:10.1002/0471250953.bi1107s32.
- 753 Le Rumeur, E., Winder, S. J., and Hubert, J. F. (2010). Dystrophin: More than just the sum of its  
754 parts. *Biochim. Biophys. Acta - Proteins Proteomics* 1804, 1713–1722.  
755 doi:10.1016/j.bbapap.2010.05.001.

- 756 Li, Y. I., Sanchez-Pulido, L., Haerty, W., and Ponting, C. P. (2015). RBFOX and PTBP1 proteins  
757 regulate the alternative splicing of micro-exons in human brain transcripts. *Genome Res.* 25, 1–  
758 13. doi:10.1101/gr.181990.114.
- 759 Li, Y. I., van de Geijn, B., Raj, A., Knowles, D. A., Petti, A. A., Golan, D., et al. (2016). RNA  
760 splicing is a primary link between genetic variation and disease. *Science* 352, 600–4.  
761 doi:10.1126/science.aad9417.
- 762 Nishida, A., Minegishi, M., Takeuchi, A., Awano, H., Niba, E. T. E., and Matsuo, M. (2015).  
763 Neuronal SH-SY5Y cells use the C-dystrophin promoter coupled with exon 78 skipping and  
764 display multiple patterns of alternative splicing including two intronic insertion events. *Hum.*  
765 *Genet.* 134, 993–1001. doi:10.1007/s00439-015-1581-2.
- 766 Nostrand, E. L. Van, Freese, P., Pratt, G. A., Wang, X., Wei, X., Blue, S. M., et al. (2018). A Large-  
767 Scale Binding and Functional Map of Human RNA Binding Proteins. *bioRxiv*, [created 2018  
768 Oct 04; cited 2018 Dec 17]. doi:<https://doi.org/10.1101/179648>.
- 769 Pan, Q., Shai, O., Lee, L. J., Frey, B. J., and Blencowe, B. J. (2008). Deep surveying of alternative  
770 splicing complexity in the human transcriptome by high-throughput sequencing. *Nat. Genet.*  
771 40, 1413–1415. doi:10.1038/ng.259.
- 772 Park, E., Pan, Z., Zhang, Z., Lin, L., and Xing, Y. (2018). The Expanding Landscape of Alternative  
773 Splicing Variation in Human Populations. *Am. J. Hum. Genet.* 102, 11–26.  
774 doi:10.1016/j.ajhg.2017.11.002.
- 775 Pertea, M. (2001). GeneSplicer: a new computational method for splice site prediction. *Nucleic Acids*  
776 *Res.* 29, 1185–1190. doi:10.1093/nar/29.5.1185.
- 777 Pollard, K. S., Hubisz, M. J., Rosenbloom, K. R., and Siepel, A. (2010). Detection of nonneutral  
778 substitution rates on mammalian phylogenies. *Genome Res.* 20, 110–121.  
779 doi:10.1101/gr.097857.109.
- 780 Poplin, R., Chang, P. C., Alexander, D., Schwartz, S., Colthurst, T., Ku, A., et al. (2018). A universal  
781 snp and small-indel variant caller using deep neural networks. *Nat. Biotechnol.* 36, 983.  
782 doi:10.1038/nbt.4235.
- 783 Quinlan, A. R., and Hall, I. M. (2010). BEDTools: A flexible suite of utilities for comparing genomic  
784 features. *Bioinformatics* 26, 841–842. doi:10.1093/bioinformatics/btq033.
- 785 R Core Development Team (2013). A language and environment for statistical computing. Available  
786 at: <http://www.r-project.org/>.
- 787 Rau, F., Lainé, J., Ramanoudjame, L., Ferry, A., Arandel, L., Delalande, O., et al. (2015). Abnormal  
788 splicing switch of DMD’s penultimate exon compromises muscle fibre maintenance in  
789 myotonic dystrophy. *Nat. Commun.* 6, 7205. doi:10.1038/ncomms8205.
- 790 Schwartz, S., Meshorer, E., and Ast, G. (2009). Chromatin organization marks exon-intron structure.  
791 *Nat. Struct. Mol. Biol.* 16, 990–995. doi:10.1038/nsmb.1659.



- 792 Sibley, C. R., Blazquez, L., and Ule, J. (2016). Lessons from non-canonical splicing. *Nat. Rev.*  
793 *Genet.* 17, 407–421. doi:10.1038/nrg.2016.46.
- 794 Siepel, A., Bejerano, G., Pedersen, J. S., Hinrichs, A. S., Hou, M., Rosenbloom, K., et al. (2005).  
795 Evolutionarily conserved elements in vertebrate, insect, worm, and yeast genomes. *Genome*  
796 *Res.* 15, 1034–1050. doi:10.1101/gr.3715005.
- 797 Siepel, A., Pollard, K. S., and Haussler, D. (2006). “New Methods for Detecting Lineage-Specific  
798 Selection,” in *Lecture Notes in Computer Science (including subseries Lecture Notes in*  
799 *Artificial Intelligence and Lecture Notes in Bioinformatics)*, 190–205.  
800 doi:10.1007/11732990\_17.
- 801 Suñé-Pou, M., Prieto-Sánchez, S., Boyero-Corral, S., Moreno-Castro, C., Yousfi, Y. El, Suñé-Negre,  
802 J. M., et al. (2017). Targeting Splicing in the Treatment of Human Disease. *Genes (Basel)*. 8,  
803 87. doi:10.3390/genes8030087.
- 804 Tadayoni, R., Rendon, A., Soria-Jasso, L. E., and Cisneros, B. (2012). Dystrophin Dp71: The  
805 smallest but multifunctional product of the duchenne muscular dystrophy gene. *Mol.*  
806 *Neurobiol.* 45, 43–60. doi:10.1007/s12035-011-8218-9.
- 807 Tapial, J., Ha, K. C. H., Sterne-Weiler, T., Gohr, A., Braunschweig, U., Hermoso-Pulido, A., et al.  
808 (2017). An atlas of alternative splicing profiles and functional associations reveals new  
809 regulatory programs and genes that simultaneously express multiple major isoforms. *Genome*  
810 *Res.* 27, 1759–1768. doi:10.1101/gr.220962.117.
- 811 Tian, J., Wang, Z., Mei, S., Yang, N., Yang, Y., Ke, J., et al. (2019). CancerSplicingQTL: a database  
812 for genome-wide identification of splicing QTLs in human cancer. *Nucleic Acids Res.* 47,  
813 D909–D916. doi:10.1093/nar/gky954.
- 814 Tuffery-Giraud, S., Miro, J., Koenig, M., and Claustres, M. (2017). Normal and altered pre-mRNA  
815 processing in the DMD gene. *Hum. Genet.* 136, 1155–1172. doi:10.1007/s00439-017-1820-9.
- 816 Ustianenko, D., Weyn-Vanhentenryck, S. M., and Zhang, C. (2017). Microexons: discovery,  
817 regulation, and function. *Wiley Interdiscip. Rev. RNA* 8, e1418. doi:10.1002/wrna.1418.
- 818 Van Nostrand, E. L., Pratt, G. A., Shishkin, A. A., Gelboin-Burkhart, C., Fang, M. Y.,  
819 Sundararaman, B., et al. (2016). Robust transcriptome-wide discovery of RNA-binding protein  
820 binding sites with enhanced CLIP (eCLIP). *Nat. Methods* 13, 508–514.  
821 doi:10.1038/nmeth.3810.
- 822 Volfovsky, N., Haas, B. J., and Salzberg, S. L. (2003). Computational discovery of internal micro-  
823 exons. *Genome Res.* 13, 1216–1221. doi:10.1101/gr.677503.
- 824 Wang, E. T., Sandberg, R., Luo, S., Khrebtkova, I., Zhang, L., Mayr, C., et al. (2008). Alternative  
825 isoform regulation in human tissue transcriptomes. *Nature* 456, 470–476.  
826 doi:10.1038/nature07509.
- 827 Wang, G.-S., and Cooper, T. A. (2007). Splicing in disease: disruption of the splicing code and the  
828 decoding machinery. *Nat. Rev. Genet.* 8, 749–761. doi:10.1038/nrg2164.

- 829 Wang, J., Duncan, D., Shi, Z., and Zhang, B. (2013a). WEB-based GEne SeT AnaLysis Toolkit  
830 (WebGestalt): update 2013. *Nucleic Acids Res.* 41, W77-83. doi:10.1093/nar/gkt439.
- 831 Wang, Y., Liu, J., Huang, B., Xu, Y.-M., Li, J., Huang, L.-F., et al. (2015). Mechanism of alternative  
832 splicing and its regulation. *Biomed. Reports* 3, 152–158. doi:10.3892/br.2014.407.
- 833 Wang, Y., Ma, M., Xiao, X., and Wang, Z. (2012). Intronic splicing enhancers, cognate splicing  
834 factors and context-dependent regulation rules. *Nat. Struct. Mol. Biol.* 19, 1044–1053.  
835 doi:10.1038/nsmb.2377.
- 836 Wang, Y., Xiao, X., Zhang, J., Choudhury, R., Robertson, A., Li, K., et al. (2013b). A complex  
837 network of factors with overlapping affinities represses splicing through intronic elements. *Nat.*  
838 *Struct. Mol. Biol.* 20, 36–45. doi:10.1038/nsmb.2459.
- 839 Xiao, X., Chang, H., and Li, M. (2017). Molecular mechanisms underlying noncoding risk variations  
840 in psychiatric genetic studies. *Mol. Psychiatry* 22, 497–511. doi:10.1038/mp.2016.241.
- 841 Xue, Y., Ouyang, K., Huang, J., Zhou, Y., Ouyang, H., Li, H., et al. (2013). Direct conversion of  
842 fibroblasts to neurons by reprogramming PTB-regulated MicroRNA circuits. *Cell* 152, 82–96.  
843 doi:10.1016/j.cell.2012.11.045.
- 844 Yan, Q., Weyn-Vanhenryck, S. M., Wu, J., Sloan, S. A., Zhang, Y., Chen, K., et al. (2015).  
845 Systematic discovery of regulated and conserved alternative exons in the mammalian brain  
846 reveals NMD modulating chromatin regulators. *Proc. Natl. Acad. Sci. U. S. A.* 112, 3445–3450.  
847 doi:10.1073/pnas.1502849112.
- 848 Zuallaert, J., Godin, F., Kim, M., Soete, A., Saeys, Y., and De Neve, W. (2018). SpliceRover:  
849 interpretable convolutional neural networks for improved splice site prediction. *Bioinformatics*  
850 34, 4180–4188. doi:10.1093/bioinformatics/bty497.

851

## 852 1 Data Availability Statement

853 The datasets analyzed during the current study are available in the ENCODE repository, at  
854 <https://www.encodeproject.org>.

855

856 **Table 1. Groups of introns that flank micro-exons and have different micro-exon-splicing**  
 857 **predictive *PositionScore* values**

| Groups <sup>a</sup> | Median Absolute <i>PositionScore</i> | Mean Absolute <i>PositionScore</i> (±SD) | Median Distance <sup>b</sup> | Mean Distance <sup>b</sup> (±SD) | Median PhastCon Score 7way | Mean PhastCon Score 7way (±SD) |
|---------------------|--------------------------------------|------------------------------------------|------------------------------|----------------------------------|----------------------------|--------------------------------|
| A                   | 0.37                                 | 0.405 (±0.116)                           | 9                            | 10.657 (±11.324)                 | 0.247                      | 0.380 (±0.362)                 |
| B                   | 0.23                                 | 0.234 (±0.022)                           | 12                           | 18.557 (±20.465)                 | 0.161                      | 0.344 (±0.367)                 |
| C                   | 0.18                                 | 0.18 (±0.011)                            | 13                           | 23.833 (±24.699)                 | 0.107                      | 0.316 (±0.365)                 |
| D                   | 0.15                                 | 0.149 (±0.007)                           | 15                           | 28.881 (±27.819)                 | 0.075                      | 0.287 (±0.354)                 |
| E                   | 0.13                                 | 0.127 (±0.005)                           | 18                           | 32.625 (±29.128)                 | 0.053                      | 0.270 (±0.354)                 |

858 <sup>a</sup>In total, 23,704 predictive bases were pooled, which originated from the CNN Deep Learning  
 859 analysis of the introns that flank all human 4,417 micro-exons; these represent the top 5 % bases with  
 860 the lowest, most negative *PositionScores*. These bases were divided into five groups, representing the  
 861 five top 1 % quantiles, with GroupA containing the bases with the highest absolute *PositionScore*  
 862 values (n = 4,741), and each of the four remaining groups comprised of n = 4,741 bases.

863 <sup>b</sup>Median and mean distance in nt from the intronic predictive base to the 5'- or 3'-end of the nearby  
 864 micro-exon.

865

866

867 **Table 2. Enriched motifs in the introns that flank micro-exons ( $\leq 39$  nt)**

| Group | Motif    | W | Number of sequences | Log likelihood Rate | E-value   | Adjusted E-value |
|-------|----------|---|---------------------|---------------------|-----------|------------------|
| A     | UYUYUYYY | 8 | 3783                | 16158               | 4.1e-3502 | 1.37e-3502       |
| A     | GGUGAGUS | 8 | 347                 | 2589                | 5.4e-349  | 3.6e-349         |
| A     | GGRGGAGG | 8 | 23                  | 218                 | 0.00028   | 2.80e-04         |
| B     | UYUYUYYY | 8 | 3019                | 12689               | 7.9e-2181 | 2.63e-300        |
| B     | GGURAGKG | 8 | 360                 | 2258                | 3e-182    | 2.00e-182        |
| B     | UYUUACAG | 8 | 78                  | 573                 | 5.9e-11   | 5.90e-11         |
| C     | UYUYUUY  | 8 | 2713                | 11077               | 2.2e-1625 | 7.3e-1624        |
| C     | GGURAGKV | 8 | 294                 | 1913                | 9.9e-149  | 6.60e-149        |
| C     | CDSRCCCC | 8 | 63                  | 506                 | 8.8e-20   | 8.80e-20         |
| D     | UYUYUYYY | 8 | 2498                | 10018               | 1.5e-1287 | 5e-1286          |
| D     | GGURRG   | 6 | 353                 | 2238                | 5.7e-133  | 3.80e-133        |
| D     | CCCCCACC | 8 | 72                  | 578                 | 9.5e-28   | 9.50e-28         |
| E     | UYUYUYYY | 8 | 1646                | 7624                | 6.4e-896  | 2.13e-300        |
| E     | GGSDGGGG | 8 | 354                 | 2106                | 4.8e-126  | 3.20e-126        |
| E     | SCHDCCCH | 8 | 153                 | 1028                | 1e-39     | 1.00e-39         |

868

869

870 **Table 3. Similarity between the enriched motifs in the introns containing predictive bases and**  
 871 **the RBP RNA-binding-motifs**

| ID       | Protein Name | Motif     | E-value  | Overlap | Target       | Strand | Group  |
|----------|--------------|-----------|----------|---------|--------------|--------|--------|
| s100     | PTBP1        | UYUYUYYY  | 1.36E-06 | 7       | UUUUUUU      | +      | GroupA |
| M232_0.6 | ELAVL1       | UYUYUYYY  | 7.50E-03 | 7       | UUUUUUU      | +      | GroupA |
| M077_0.6 | U2AF2        | UYUYUYYY  | 1.09E-02 | 7       | UUUUUUC      | +      | GroupA |
| M227_0.6 | PTBP1        | UYUYUYYY  | 4.95E-02 | 7       | CUUUUCU      | +      | GroupA |
| s100     | PTBP1        | UYUYUYYY  | 1.72E-09 | 7       | UUUUUUU      | +      | GroupB |
| M232_0.6 | ELAVL1       | UYUYUYYY  | 2.10E-03 | 7       | UUUUUUU      | +      | GroupB |
| M077_0.6 | U2AF2        | UYUYUYYY  | 1.05E-02 | 7       | UUUUUUC      | +      | GroupB |
| M227_0.6 | PTBP1        | UYUYUYYY  | 2.45E-02 | 7       | CUUUUCU      | +      | GroupB |
| M112_0.6 | ELAVL1       | UYUYUYYY  | 3.84E-02 | 7       | UUUGUUU      | +      | GroupB |
| s0       | ELAVL2       | UYUYUYYY  | 4.46E-02 | 8       | UUUUAUUUU    | +      | GroupB |
| M075_0.6 | TIA1         | UYUYUYYY  | 4.47E-02 | 7       | UUUUUUG      | +      | GroupB |
| s100     | PTBP1        | UYUYUUY Y | 2.62E-09 | 7       | UUUUUUU      | +      | GroupC |
| M232_0.6 | ELAVL1       | UYUYUUY Y | 7.97E-04 | 7       | UUUUUUU      | +      | GroupC |
| M077_0.6 | U2AF2        | UYUYUUY Y | 6.64E-03 | 7       | UUUUUUC      | +      | GroupC |
| M227_0.6 | PTBP1        | UYUYUUY Y | 2.85E-02 | 7       | CUUUUCU      | +      | GroupC |
| M112_0.6 | ELAVL1       | UYUYUUY Y | 4.61E-02 | 7       | UUUGUUU      | +      | GroupC |
| s0       | ELAVL2       | UYUYUUY Y | 4.66E-02 | 8       | UUUUAUUUU    | +      | GroupC |
| s100     | PTBP1        | UYUYUYYY  | 3.74E-08 | 7       | UUUUUUU      | +      | GroupD |
| M232_0.6 | ELAVL1       | UYUYUYYY  | 1.57E-03 | 7       | UUUUUUU      | +      | GroupD |
| M077_0.6 | U2AF2        | UYUYUYYY  | 1.27E-02 | 7       | UUUUUUC      | +      | GroupD |
| M227_0.6 | PTBP1        | UYUYUYYY  | 3.12E-02 | 7       | CUUUUCU      | +      | GroupD |
| 93       | PCBP1        | CCCCCACC  | 4.62E-02 | 7       | CCCCACCCUCUU | +      | GroupD |
| M075_0.6 | TIA1         | UYUYUYYY  | 4.95E-02 | 7       | UUUUUUG      | +      | GroupD |
| s100     | PTBP1        | UYUYUYYY  | 1.97E-09 | 7       | UUUUUUU      | +      | GroupE |
| M232_0.6 | ELAVL1       | UYUYUYYY  | 1.78E-03 | 7       | UUUUUUU      | +      | GroupE |
| M077_0.6 | U2AF2        | UYUYUYYY  | 3.48E-03 | 7       | UUUUUUC      | +      | GroupE |
| M227_0.6 | PTBP1        | UYUYUYYY  | 5.78E-03 | 7       | CUUUUCU      | +      | GroupE |

872

873



## 874 Figure legends

875 **Figure 1. Deep Learning CNN scheme and identification of conserved sequence patterns in the**  
876 **introns that flank micro-exons. (A)** Deep Learning Convolutional Neural Network (CNN)  
877 architecture used for the classification of micro-exons and long exons based on the sequences of their  
878 flanking intronic regions and on the interspecies conservation of these introns. This neural network  
879 architecture consists of separate input data of the intronic sequences that flank the exons (orange) and  
880 of interspecies conservation data for these introns (green), for both the downstream and upstream  
881 100-nt regions that flank the exons. Flanking sequences were processed in two input convolution  
882 layers that turn the sequences into recurring motifs in a succession of 3 convolutional layers with  
883 different kernel lengths. Input data containing the conservation level of the sequences were  
884 convoluted separately using 3 other convolutional layers with the same kernel number and length of  
885 the flanking sequence layers. The output of the 4 convolutional layers were flattened and then  
886 concatenated in a unique layer (CONCAT) containing the motif-convolved sequences. This data was  
887 propagated through two sequential fully-connected layers (blue) that output a binary classifier (red  
888 dot) containing a sigmoidal function that can discriminate a flanking micro-exon from a long exon.  
889 **(B)** Mean conservation (y-axis), calculated by the CNN model, of the first upstream and downstream  
890 100 nucleotides that flank micro-exons of different lengths (in number of bases), as indicated on the  
891 x-axis. **(C)** Receiver Operator Characteristics (ROC) curve for the CNN model classification of  
892 exons based on the conservation pattern of their 5'- and 3'-flanking introns. The Area Under the  
893 Curve (AUC) was 0.76 for the prediction performed with an independent validation dataset, using the  
894 intronic sequences that flank micro-exons ( $\leq 39$  nt) and long exons ( $> 39$  nt). The dotted line  
895 represents the accuracy values for a random model (AUC = 0.5).

896 **Figure 2. Positions of critical bases conservation along the introns that flank all human micro-**  
897 **exons.** On the y-axis each of the 4,417 micro-exons, that were used in training and validation of the  
898 Deep Learning CNN model, is represented in one line. The x-axis shows the 200 nucleotides that  
899 flank each micro-exon (100 nt at the 5' or 3' ends); for each base of the intron sequence that flanks  
900 the micro-exon, the delta value (*PositionScore*) of the prediction perturbation caused by the *in silico*  
901 point mutation of that base is represented by the color; the delta was calculated by subtracting the  
902 intronic sequence prediction value, obtained after the base at a given position was changed to the  
903 other 3 possible bases, from the intronic sequence prediction value using the original wild-type base.  
904 The heatmap has clustered the micro-exons according to the *PositionScore* pattern of the intron  
905 sequences that flank each micro-exon. On the upper left is the color scale of the perturbation  
906 *PositionScore* values. Positive values indicate that the *in silico* mutation increased the probability that  
907 a given sequence was classified as an intron that flank a micro-exon, and negative values show that  
908 the *in silico* mutation increased the probability that the sequence was mistakenly classified as an  
909 intron that flank a long exon.

910 **Figure 3. Splicing-predictive bases *PositionScore* distribution along the introns that flank**  
911 **micro-exons. (A)** Density distribution of intron predictive bases (y-axis) as a function of distance to  
912 the micro-exons (x-axis), either upstream (-1 to -100 nt) or downstream (+1 to +100 nt) of the micro-  
913 exon ends. Distance equal to 0 marks the micro-exon. Each group is shown with a different color, as  
914 indicated at the bottom. Comparison of distribution between groups showed statistically significant  
915 difference (Kolmogorov-Smirnov test, p-value  $< 0.05$ ), except for GroupD vs GroupE. **(B)**  
916 Cumulative distribution of PhastCon7way values for each of the five groups, indicated by the colors.  
917 The y-axis shows the cumulative distribution and the x-axis shows the PhastCon7way score.  
918 Statistical differences in PhastCon7way scores distribution were observed in all comparisons using  
919 GroupA or GroupB (Kolmogorov-Smirnov test, p value  $< 0.05$ ). **(C)** Box plot of absolute values of

920 *PositionScore* of intron predictive bases (y-axis) as a function of PhastCon7wayScore computed in  
921 intervals of 20 percentile (x-axis). All *PositionScores* from the five groups (GroupA to GroupE) were  
922 plotted together. Correlation between *PositionScore* and PhastCon7wayScore was calculated  
923 (Spearman's correlation,  $\rho = -0.14$ ,  $p\text{-value} < 0.05$ ).

924 **Figure 4. Enriched sequence motifs that contain the predictive bases identified by the CNN**  
925 **algorithm in the introns of neighboring micro-exons. (A)** Number of intron sequences that support  
926 the enrichment of each motif indicated at left. The x-axis shows the number of intron sequences that  
927 contain the predictive bases within the corresponding motif, calculated as a percentage of the total  
928 number of sequences in the corresponding group (A to E). The y-axis shows for each group the  
929 sequence motifs 1 to 3, ordered from top to bottom according to the enrichment significance (based  
930 on the adjusted E-value). **(B)** Panels with logo sequences of the conserved motifs 1 to 3 in each group  
931 A to E, indicated at right. **(C)** Distribution of the relative position of the predictive bases within each  
932 motif, for motifs 1 to 3. Predictive bases were determined by the Deep Learning CNN algorithm as  
933 important in the intron for predicting neighboring micro-exon processing, in each group (A to E, as  
934 indicated at right). The x-axis shows the position within the enriched motif and the y-axis shows the  
935 number of predictive bases that were located at the corresponding position.

936 **Figure 5. Diagram to represent the similarities of each predictive-base-containing enriched**  
937 **motif with the respective RBP RNA-binding-motifs. (A)** Presence of the circle indicates that, for  
938 that group, the similarity between the enriched motif containing a predictive base identified by our  
939 CNN model (indicated at the top) and the known RNA-binding-motif of the RBP indicated at left has  
940 reached the adjusted E-value threshold  $< 0.05$ . The circle colors and sizes are proportional to the  
941 degree of significance ( $-\log E\text{-value}$ ) of the sequence similarity, with the values indicated in the scale  
942 at the bottom. **(B)** GO biological processes ( $n = 14$ ) significantly enriched ( $FDR \leq 5\%$ ) among the six  
943 RBPs identified as involved in micro-exon splicing. The x-axis bar represents the enrichment rate  
944 (observed/expected) and the y-axis shows the GO categories. The names in blue are for the GOs  
945 related to the splicing process.

946 **Figure 6. RBP motif enrichment analyses along the intron sequences that flank micro-exons.**  
947 **(A)** The y-axis represents the average occurrence of the motif along the intronic sequences upstream  
948 (-100 to 0) and downstream (0 to +100) of the micro-exons. Data originated from our analysis of  
949 enriched motifs that contain micro-exon-predictive bases in the introns that flank micro-exons are  
950 gold-colored. All enriched RBPs data from the *in silico* search of RNA-binding-motifs against the  
951 ATtRACT Database are plotted with the blue-black color scale. **(B-D)** Re-analysis of eCLIP-seq  
952 public data using HepG2 for the analysis of PTBP1 RNA-binding **(B)**, U2AF2 RNA-binding **(C)** and  
953 TIA1 RNA-binding **(D)**. The y-axis in B to D represents the average occurrence of signal density for  
954 the RBP relative to mock. Signal values are shown with the yellow-brown scale for intronic regions  
955 that flank micro-exons of the five groups (GroupA to GoupE), and with the black color for intronic  
956 regions that flank long exons ( $> 39$  nt). The x-axis shows the distances along the intron sequence  
957 upstream (-100 to 0) or downstream (0 to 100 nt) of the micro-exon (or long exon).

958 **Figure 7. Splicing pattern of dystrophin (DMD) micro-exon 78 (32-nt-long) at chrX:31,126,642-**  
959 **31,126,673. (A)** Positions of critical bases conservation along the introns that flank micro-exon  
960 (exon78). The x-axis shows the 200 nucleotides that flank *DMD* gene micro-exon 78 (100 nt at the 5'  
961 or 3' ends); for each base of the intron sequence that flanks the micro-exon, the delta value  
962 (*PositionScore*) of the prediction perturbation caused by the *in silico* point mutation of that base is  
963 represented by the color; the *PositionScore* was calculated by subtracting the intronic sequence  
964 prediction value obtained after the base at a given position was *in silico* mutated to each of the other

965 3 possible bases from the intronic sequence prediction value using the original wild-type base. Each  
966 row represents a specific base, and the base that comprises the wild-type sequence has *PositionScore*  
967 = 0 by definition. *PositionScore* color scale is shown at right. **(B)** *DMD* gene micro-exon (32-nt-  
968 long) fractional abundance change upon knock down of the *PTBPI* gene in HepG2 cells. The graph  
969 on the left shows the density distribution of Percent Spliced-In (PSI) events for the *DMD* gene exon  
970 78. There were only two experimental samples in each of the control (blue) and *PTBPI*-silenced  
971 (orange) groups; the curves represent the density distribution of values that the group mean PSI can  
972 assume, corrected by the variance of other events that have close PSI values. The graph on the right  
973 shows the calculation of the difference between the PSI mean of each of the groups. In this case,  
974 there is a 95% probability that the mean difference is 0.13 ( $\Delta\text{PSI} = 0.13$ ) between the groups, which  
975 means that *DMD* gene micro-exon retention had increased by 13 % upon silencing of the *PTBPI*  
976 splicing inhibitor, compared with control. **(C)** Genome browser representation of exon 78 (32-nt-  
977 long) locus on Chr. X plus 100 nt intronic sequence on both sides of the exon, in the hg38 assembly.  
978 All isoforms of GENCODE annotation for the *DMD* gene are represented in dark blue lines, micro-  
979 exon encoded amino acids are represented by dark blue squares. The RNA-seq reads from the *PTBPI*  
980 silencing assays that mapped to the locus, from both HepG2 and K562 cell lineages are marked in  
981 orange for *PTBPI* knock down shRNA samples, and in light blue for control samples. Only one  
982 replicate sample that showed the highest expression of *DMD* exon 78 for each cell line and condition  
983 were represented in the Figure.

984

## 985 **Supporting Information**

986 **Supplementary Figure 1. *PositionScore* absolute values across the five groups and their values**  
987 **versus distance to micro-exon end.** **(A)** Boxplot distribution of *PositionScore* values within each of  
988 the five groups (A to E) into which the top 5 % most predictive intron bases identified by the Deep  
989 Learning CNN algorithm were divided. *PositionScore* values were calculated for each of the 200 bases  
990 that flank the 5'- and 3'-end of each of 4,908 micro-exons, and the top 5 % most predictive bases (with  
991 the highest *PositionScore* absolute values) were retrieved and divided into 5 groups, GroupA  
992 representing the top 1 % highest percentile and GroupE the lowest percentile. The y-axis shows the  
993 absolute value of *PositionScore*, the x axis shows the five different groups. **(B)** Box plot of absolute  
994 values of *PositionScore* of intron predictive bases (y-axis) as function of the distance to the micro-exon  
995 end was computed in 20-nt windows along the intron (x-axis). All *PositionScores* from the five groups  
996 (GroupA to GroupE) were plotted together. Correlation between *PositionScore* and distance to the  
997 micro-exon was calculated (Kendall's rank correlation, tau = -0.23, p-value < 2.2e-16).

998

999 **Supplementary Figure 2. Cumulative Distribution of PhastCon100way according to groups of**  
1000 **splicing-predictive bases *PositionScore*.** Cumulative distribution of PhastCon100way values for each  
1001 of the five groups, indicated by colors. The y-axis shows the cumulative distribution and the x-axis  
1002 shows the PhastCon100way score. Statistical differences in PhastCon100 way scores distribution were  
1003 observed in all comparisons (KS-test, p-value < 0.05).

1004

1005 **Supplementary Figure 3. *PositionScores* heatmap of long-exon model introns.** On the y-axis each  
1006 of the 4,417 long exons used in training and validation the Deep Learning CNN model is represented  
1007 in one line. The x-axis shows the 200 nucleotides that flank each long-exon (100 nt at the 5' or 3' ends).

1008 The delta value (*PositionScore*) of the prediction perturbation caused by the *in silico* point mutation of  
1009 that base is represented by the color; the delta is calculated by subtracting the intronic sequence  
1010 prediction value, obtained after the base at a given position was changed to the other 3 possible bases,  
1011 from the intronic sequence prediction value using the original wild-type base. The heatmap has  
1012 clustered the long exons according to the *PositionScore* pattern of the intron sequences that flank each  
1013 long exon. On the upper left is the color scale of the perturbation *PositionScore* values. Positive values  
1014 indicate that the *in silico* mutation increased the probability that a given sequence was classified as an  
1015 intron that flank a long exon, and negative values show that the *in silico* mutation increased the  
1016 probability that the sequence was mistakenly classified as an intron that flank a micro-exon.

1017

1018 **Supplementary Figure 4. Enriched sequence motifs that contain the predictive bases identified**  
1019 **by the CNN model in the introns of neighboring long exons.** (A) Percent of intron sequences that  
1020 support the enrichment of each motif indicated at left. The x-axis shows the percent of intron sequences  
1021 that contain the predictive bases within the corresponding motif, calculated as a percentage of the total  
1022 number of sequences in the corresponding group (A to E). The y-axis shows for each group the  
1023 sequence motifs 1 to 3, ordered from top to bottom according to the enrichment significance (based on  
1024 the adjusted E-value). (B) Similarities of each predictive-base-containing enriched motif with the  
1025 respective RBP RNA-binding-motifs. Presence of the circle indicates that, for that group, the similarity  
1026 between the enriched motif containing a predictive base (indicated at the top) and the known RNA-  
1027 binding-motif of the RBP indicated at left has reached the adjusted E-value threshold <0.05. The circle  
1028 colors and sizes are proportional to the degree of significance (-log E-value) of the sequence similarity,  
1029 with the values indicated in the scale at the bottom.

1030

1031 **Supplementary Figure 5. RBP motif enrichment in silico analyses along the intron sequences that**  
1032 **flank micro-exons.** The y-axis represents the average occurrence of the motif along the intronic  
1033 sequences upstream (-100 to 0) and downstream (0 to +100) of the micro-exons. Data originated from  
1034 our analysis of enriched motifs that contain micro-exon-predictive bases in the introns that flank micro-  
1035 exons are gold-colored. All enriched RBPs data from the *in silico* search of RNA-binding-motifs  
1036 against the ATtRACT Database (Giudice et al., 2016) are plotted with the blue-black color scale.

1037

1038 **Supplementary Figure 6. ISS motif enrichment in silico analyses along the intron sequences that**  
1039 **flank micro-exons.** The y-axis represents the average occurrence of the motif along the intronic  
1040 sequences upstream (-100 to 0) and downstream (0 to +100) of the micro-exons. Data originated from  
1041 our analysis of enriched motifs that contain micro-exon-predictive bases in the introns that flank micro-  
1042 exons are gold-colored. All enriched RBPs data from the *in silico* search of RNA-binding-motifs  
1043 against the 10 consensus sequences of ISS defined by Wang et al. (Wang et al., 2013b), are plotted  
1044 with the red color scale; only one sequence showed enrichment, namely ISS\_consensus #1  
1045 (AGUAGG).

1046

1047 **Supplementary Figure 7. Re-analysis of eCLIP-seq public data using K562 cells for measuring**  
1048 **of PTBP1 RNA-binding, U2AF2 RNA-binding and TIA1 RNA-binding.** The y-axis represents the  
1049 mean occurrence of signal density for the RBP relative to mock. Signal values are shown with the  
1050 yellow-brown scale for intronic regions that flank micro-exons of the five groups (GroupA to GoupE),  
1051 and with the black color for intronic regions that flank long exons (> 39 nt). The x-axis shows the



1052 distances along the intron sequence upstream (-100 nt to 0) or downstream (0 to 100 nt) of the micro-  
1053 exon (or long exon).

1054

1055 **Supplementary Figure 8. Re-analysis of RNA-seq expression public data for quantification of the**  
1056 **effect on micro-exon *percent-spliced-in* (PSI) caused by silencing *PTBP1* (A) or *U2AF2* (B) in**  
1057 **HepG2 cells (left) and in K562 cells (right).** The y-axis represents micro-exons that were altered  
1058 when comparing shRNA and control. Signal values are shown with the green-red scale; red represents  
1059 increase abundance of isoform expression and green low abundance. The x-axis shows the libraries  
1060 used to perform analysis with vast-tools. All micro-exon events presented a  $PSI > 0.15$  and 95 %  
1061 probability that the mean difference is  $|\Delta PSI| > 0.10$  between the groups. Venn Diagram shows the  
1062 overlapping micro-exon splicing events in each cell line.

1063

1064 **Supplementary Figure 9. *PTBP1* knock-down in K562 cells caused an increase in *DMD* micro-**  
1065 **exon 78 insertion.** *DMD* gene micro-exon 78 (32-nt-long) fractional abundance change upon  
1066 knockdown of the *PTBP1* gene in K562 cells. The graph on the left shows the density distribution of  
1067 Percent Spliced-In (PSI) events for micro-exon 78 of the *DMD* gene. There were only two experimental  
1068 samples in each of the control (blue) and *PTBP1*-silenced (orange) groups; the curves represent the  
1069 density distribution of values that the group mean PSI had assumed, corrected by the variance of other  
1070 events that had close PSI values. The graph on the right shows the calculation of the difference between  
1071 the PSI mean of each of the groups. In this case, there was a 95 % probability that the mean difference  
1072 ( $\Delta PSI$ ) was 0.12 between the groups, which means that *DMD* gene micro-exon 78 retention had  
1073 increased by 12 % upon silencing of the *PTBP1* splicing inhibitor, compared with control.

1074

1075 **Supplementary Figure 10. Cross-comparison between the Multiplexed Functional Assay of**  
1076 **Splicing using Sort-seq (MFASS) and the percent bases predicted by the CNN *PositionScore***  
1077 **model.** The table at the top shows our re-analysis of MFASS data obtained by Cheung et al. (Cheung  
1078 et al., 2019), for the screening with a minigene reporter of 27,773 rare variants in the human genome  
1079 that had an effect on splicing. The **first column** shows the total number of variants assayed, the  
1080 percentage of those that caused a change in splicing isoforms of  $|\Delta PSI| > 0.1$ , and the percentage that  
1081 were classified as Splice-Disrupting Variants (SDVs) ( $|\Delta PSI| > 0.5$ ). The **second column** shows the  
1082 number of variants assayed by Cheung et al. that were in introns that flanked micro-exons. The **third**  
1083 **and fourth columns** show the number of variants assayed by Cheung et al. (Cheung et al., 2019) in  
1084 introns that flanked micro-exons, whose bases were also classified by our CNN model as being among  
1085 the Top25, or among the Top5, with absolute *PositionScores* ranking among the 25 % or among the 5  
1086 % with the highest prediction of impacting the micro-exon splicing, respectively. **Bar graph** at the  
1087 bottom shows the same percentage data shown on the table at the top; MIC are bases screened by  
1088 Cheung et al. (Cheung et al., 2019) that flank only intronic regions of micro-exons; Total represents  
1089 the group of all bases assayed in the study of Cheung et al. (Cheung et al., 2019), including intronic  
1090 and exonic bases located in micro-exons and long exons.

1091

1092 **Supplementary Table S1. Comparison of distance distribution (nt) using KS-test**

1093

1094 **Supplementary Table S2. Comparison of PhastCon Score using KS-test**



1095

1096 **Supplementary Table S3. Biological Pathways GO enrichment analysis of RBPs**

1097

1098 **Supplementary Table S4. Top three most enriched sequence motifs found in each of the groups**  
1099 **of intronic sequences that flank long-exons**

1100

1101 **Supplementary Table S5. Micro-exon splicing events differentially expressed upon *PTBP1* knock**  
1102 **down (KD) compared with control**

1103

1104 **Supplementary Table S6. Micro-exon splicing events differentially expressed upon *U2AF2* knock**  
1105 **down (KD) compared with control**

1106

1107

# Micro-exon splicing prediction using Deep Learning approach

1108 **Figure 1**

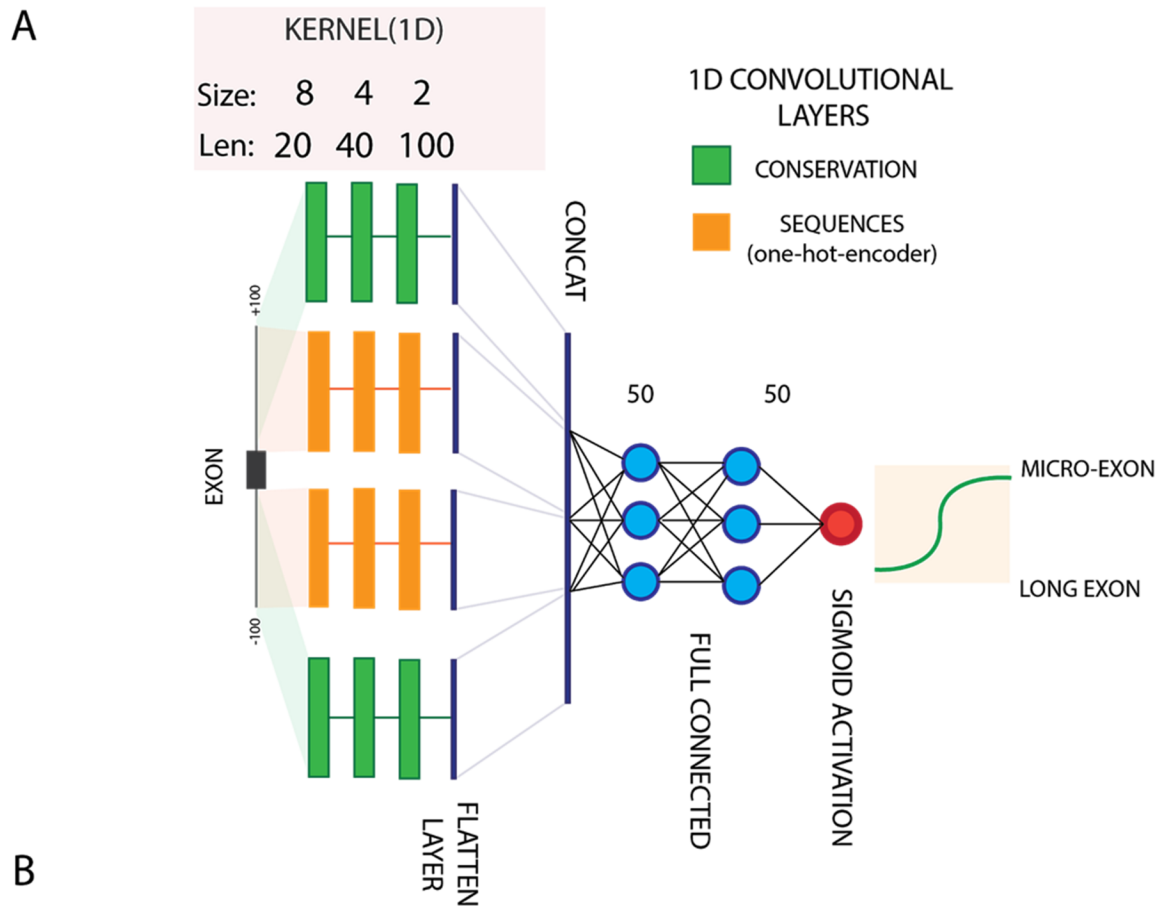

**B**

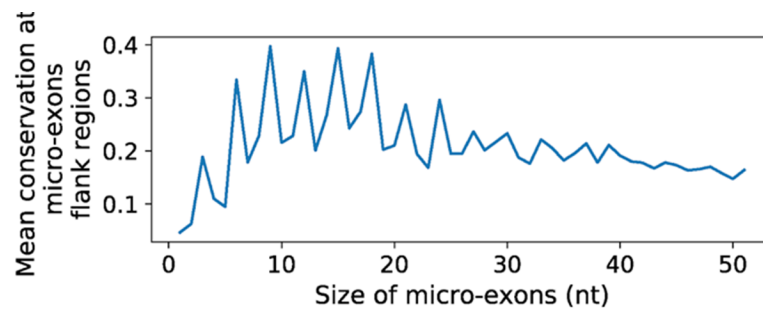

**C**

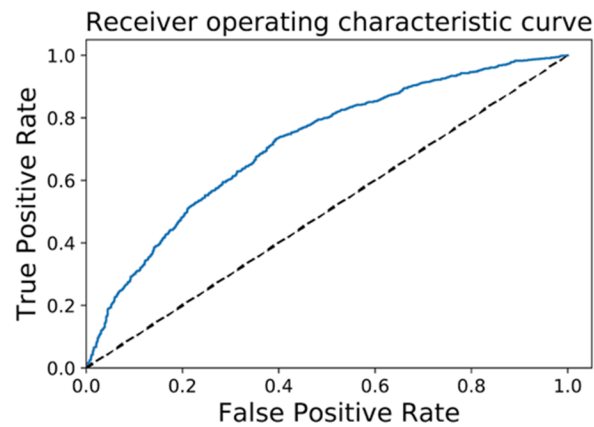

1109

1110

1111 **Figure 2**

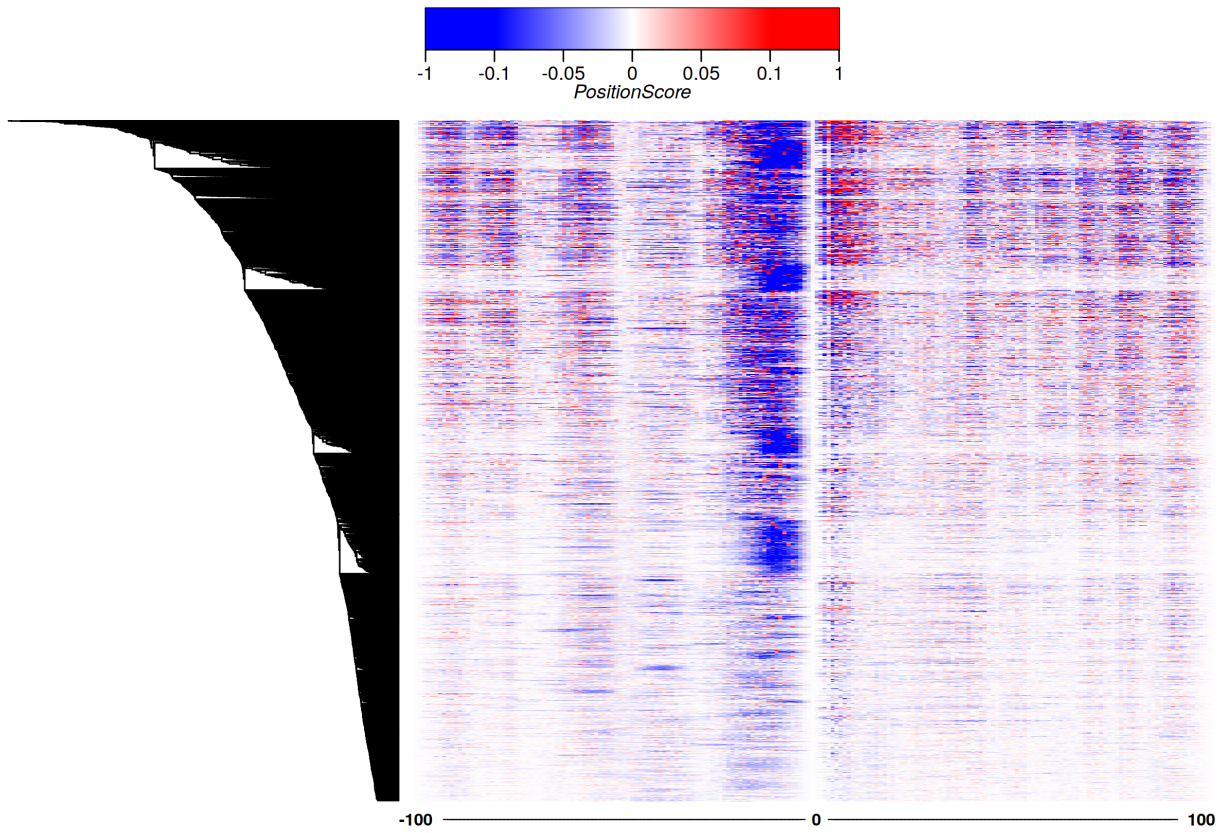

1112

1113

# Micro-exon splicing prediction using Deep Learning approach

1114 **Figure 3**

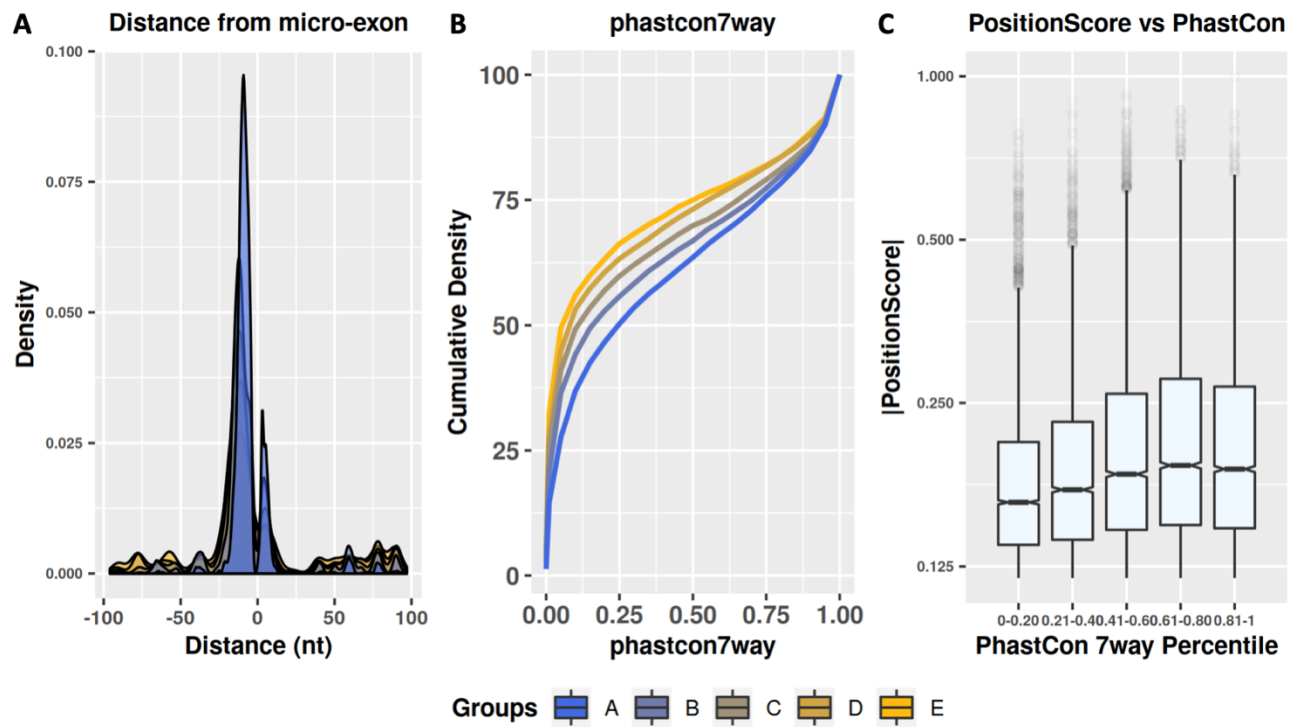

1115

1116

# Micro-exon splicing prediction using Deep Learning approach

1117 **Figure 4**

1118

1119

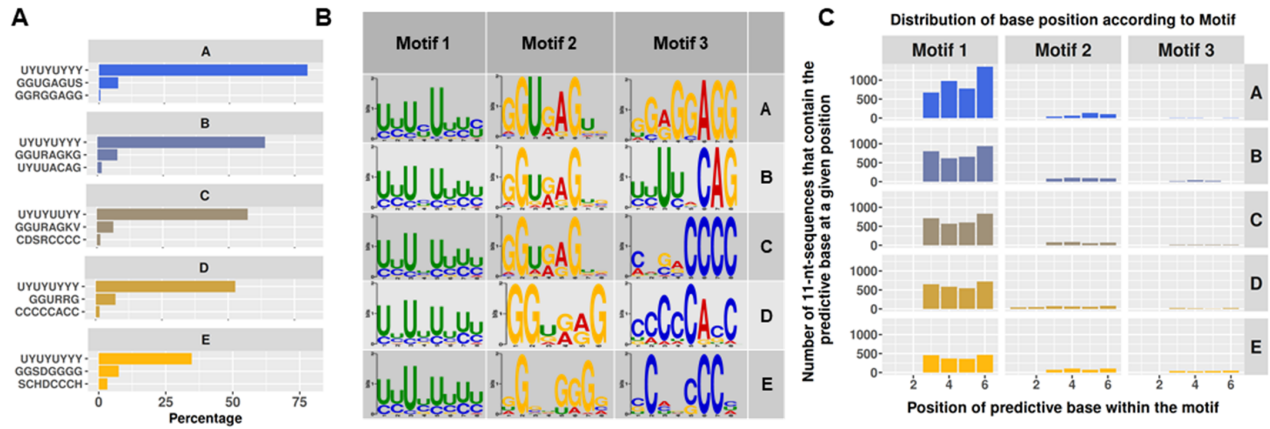

1120

1121



# Micro-exon splicing prediction using Deep Learning approach

1122 **Figure 5**

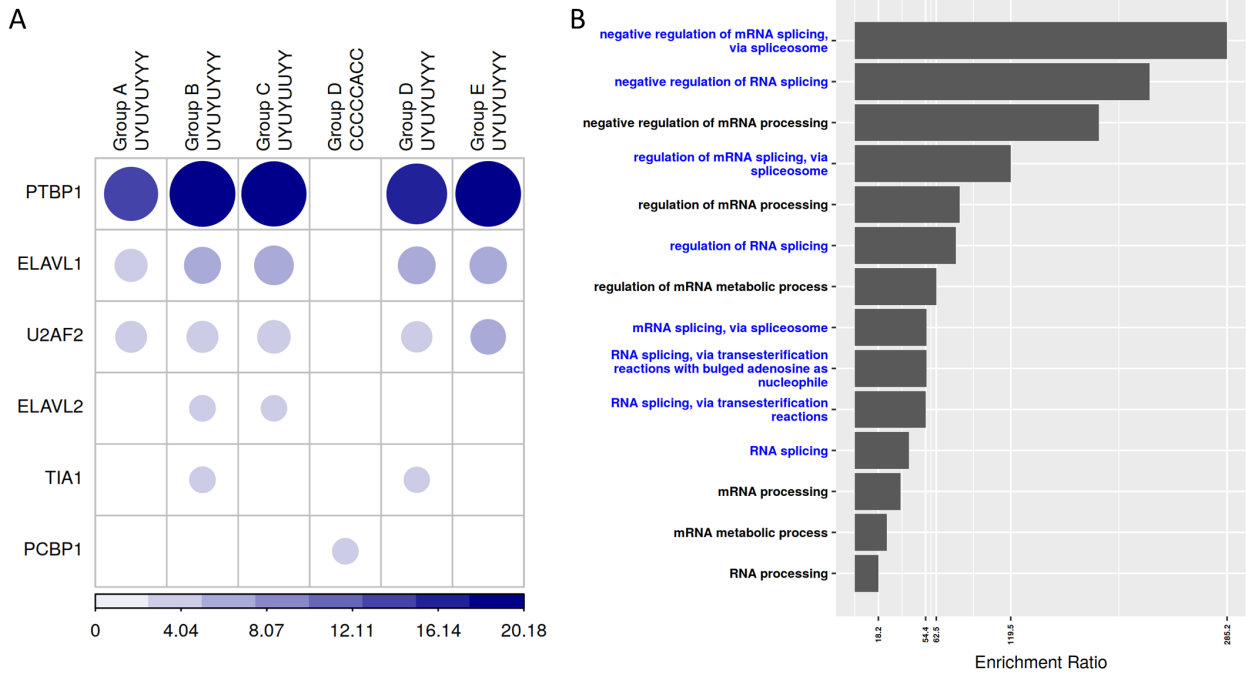

1123

1124

1125 **Figure 6**

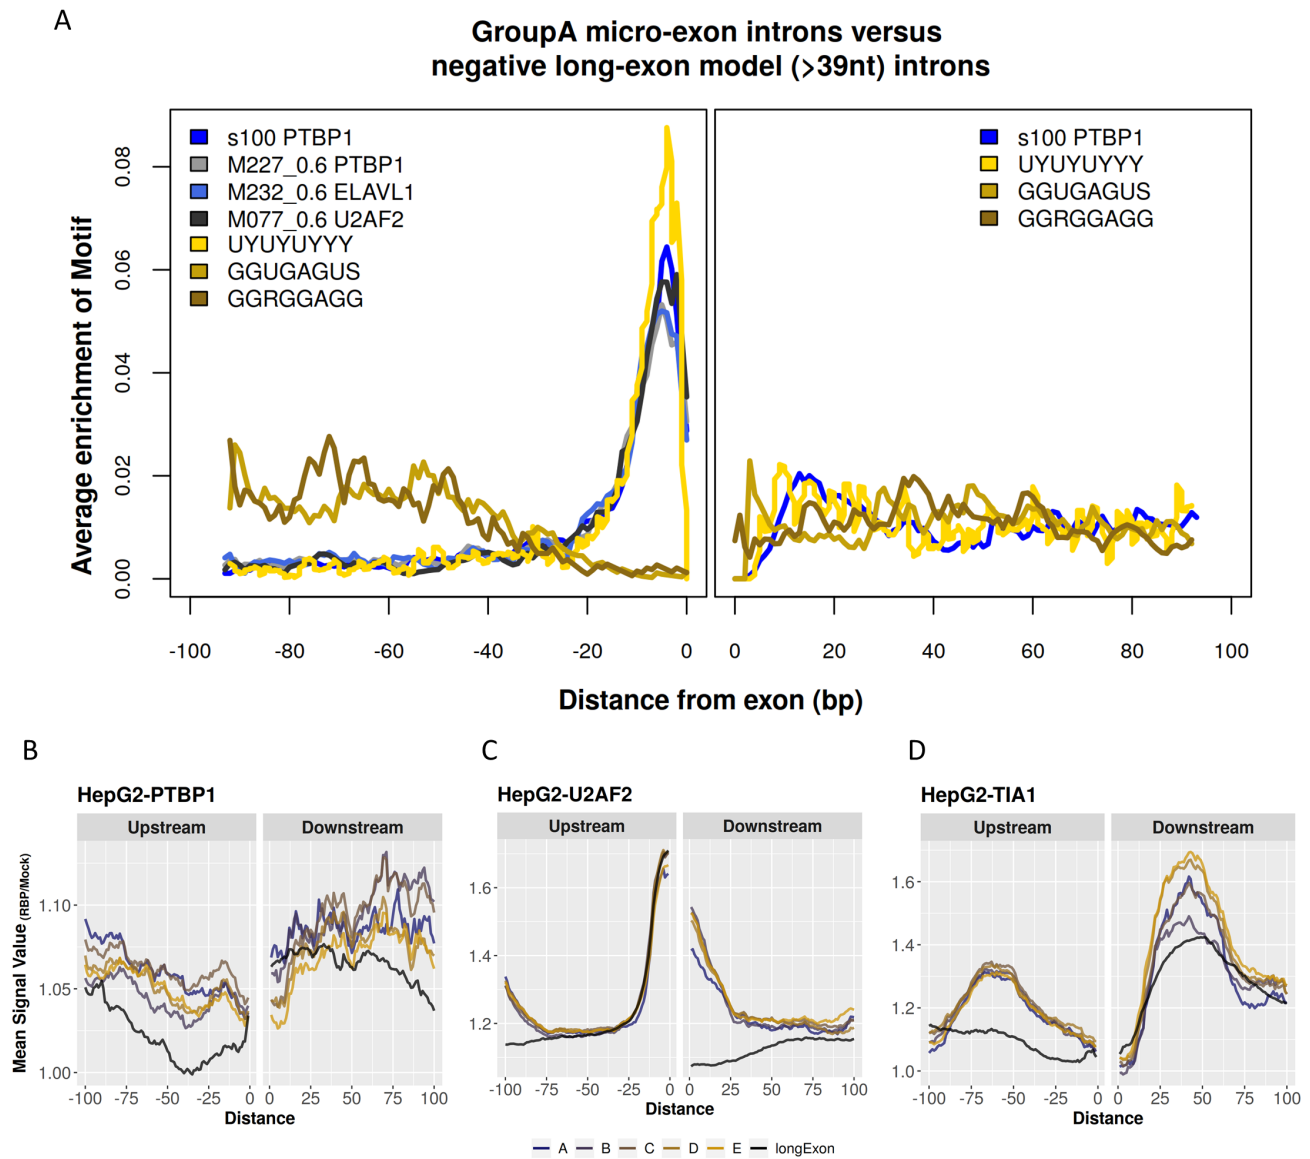

1126

1127

1128 **Figure 7**

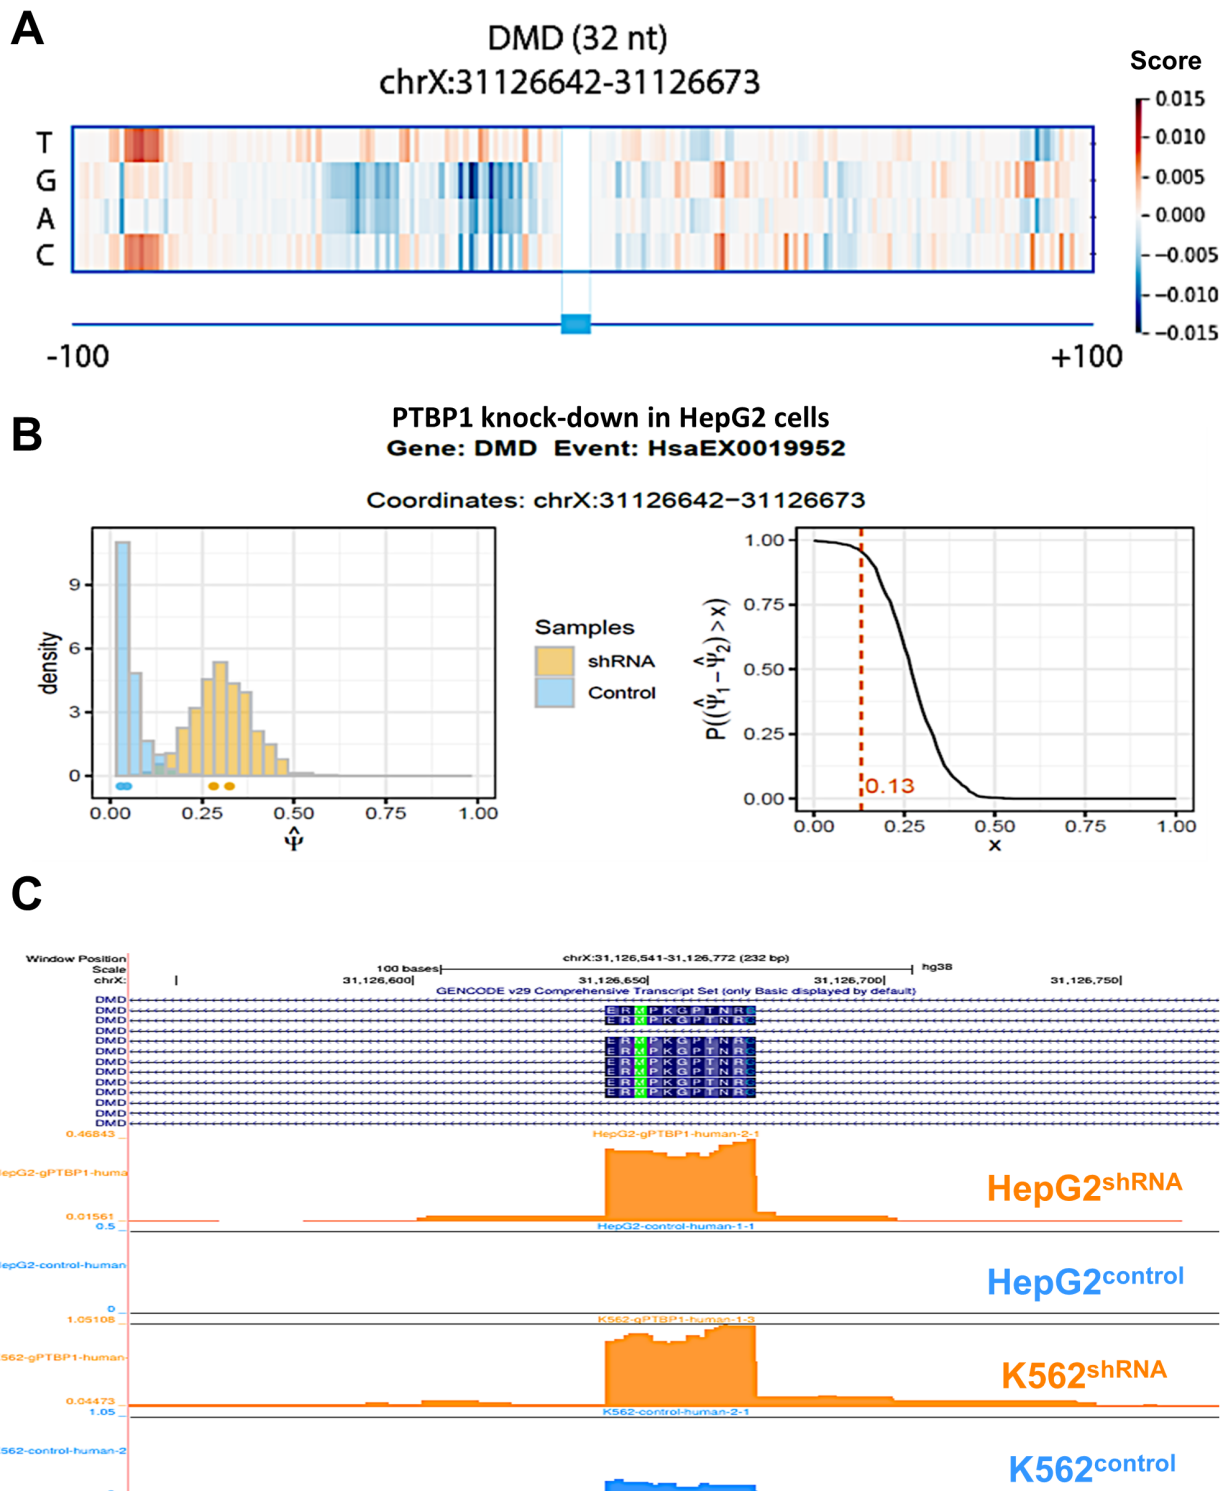

1129

1130

1131 **Supplementary Figure 1**

1132

1133

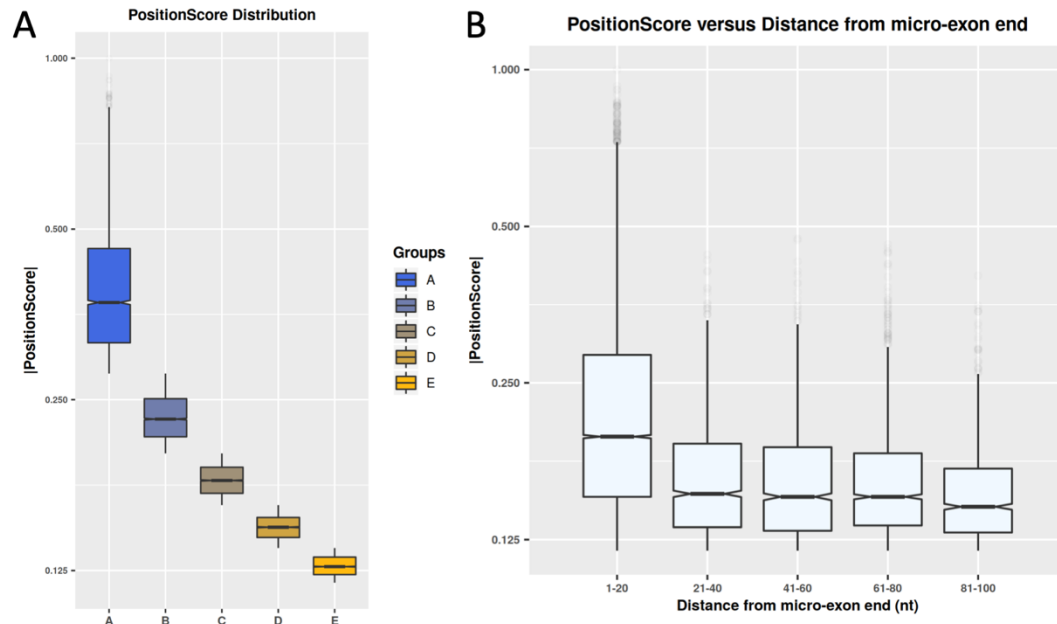

1134 **Supplementary Figure 2**

1135

1136

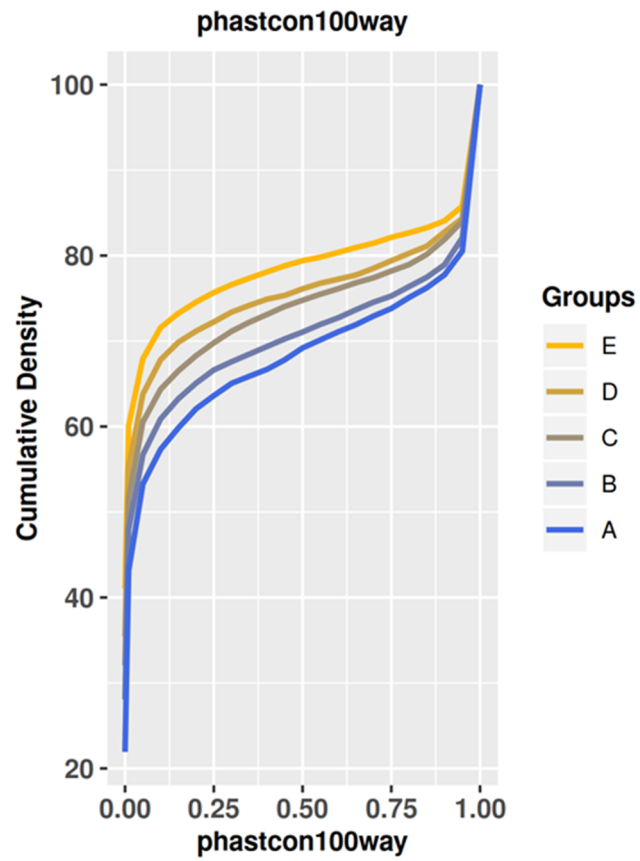



1137 **Supplementary Figure 3**

1138

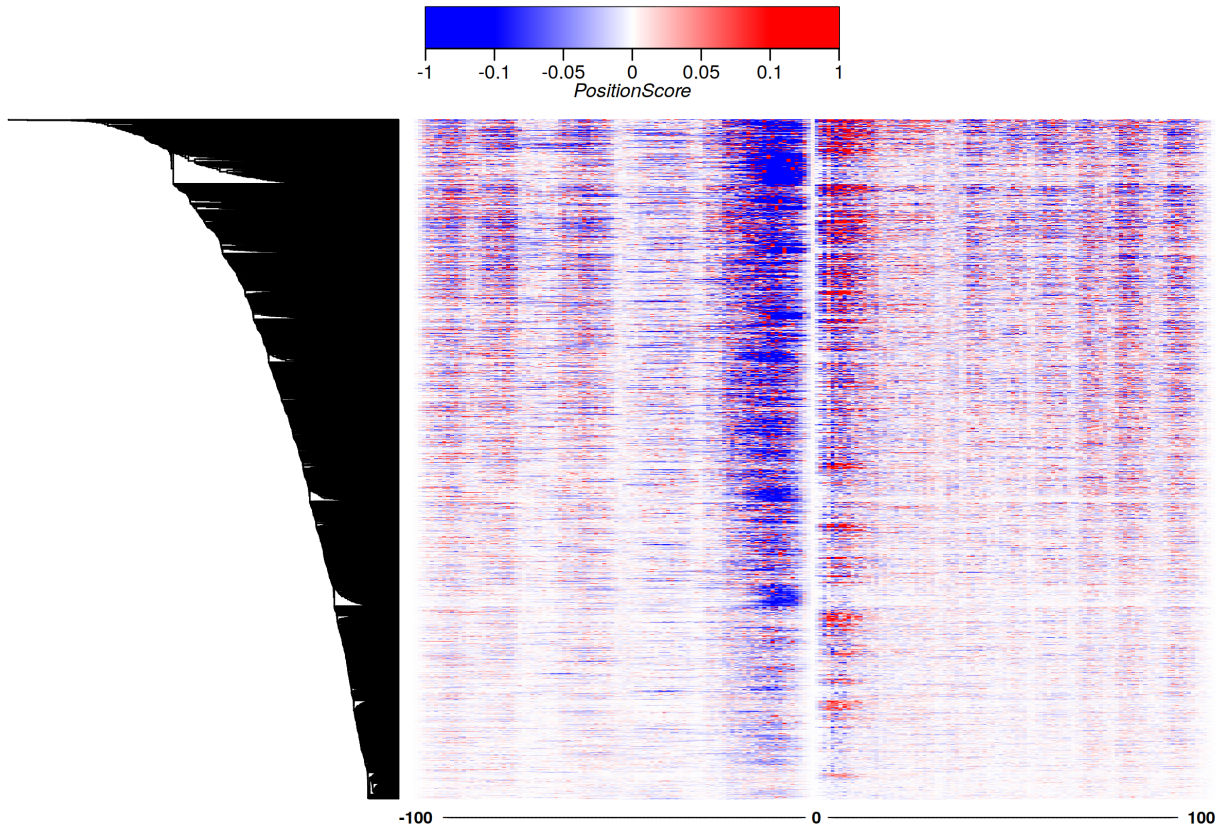

1139

1140

Micro-exon splicing prediction using Deep Learning approach

1141 **Supplementary Figure 4**

1142

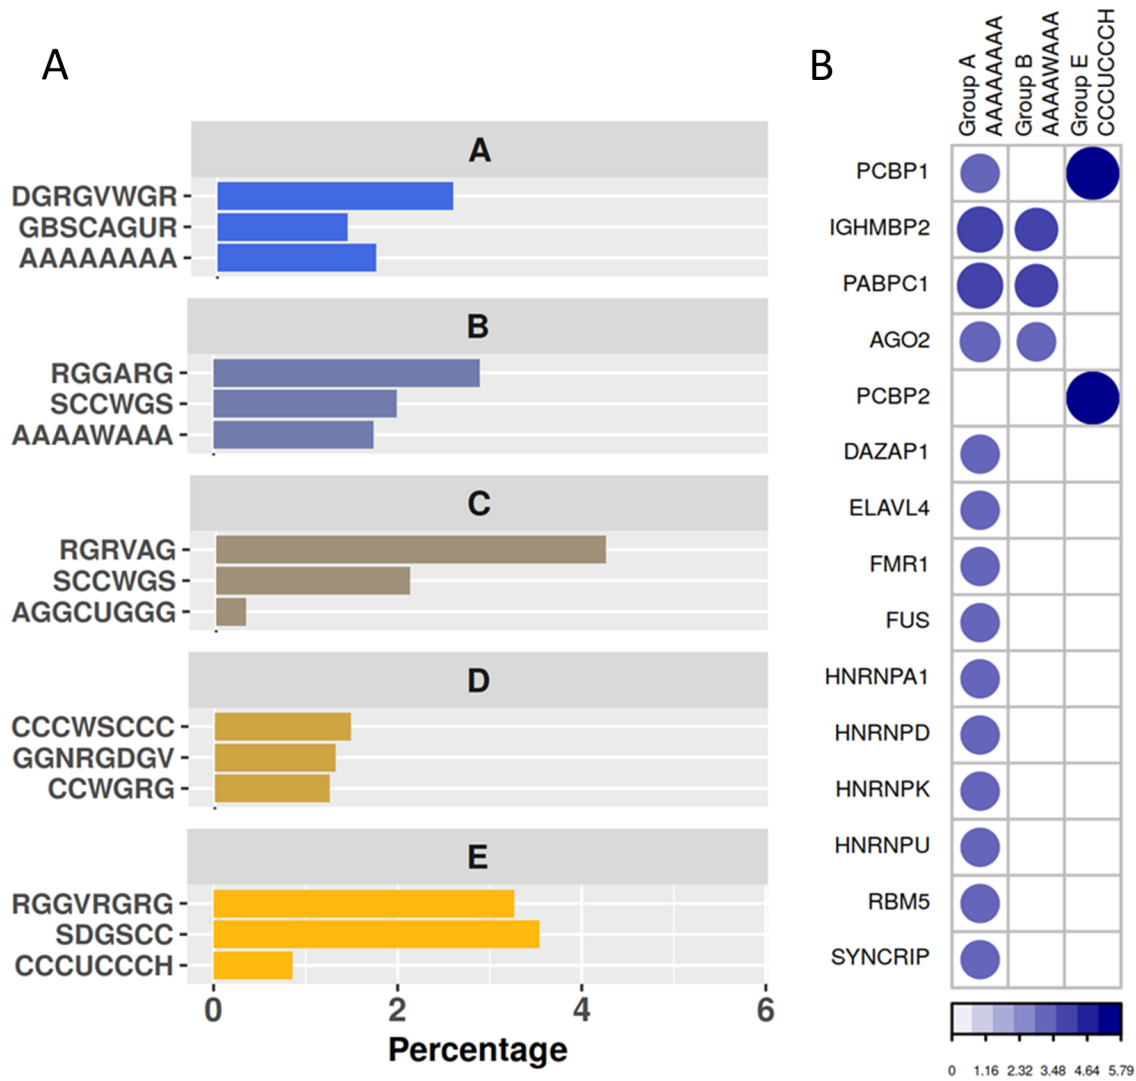

1143

1144

1145 **Supplementary Figure 5**

1146

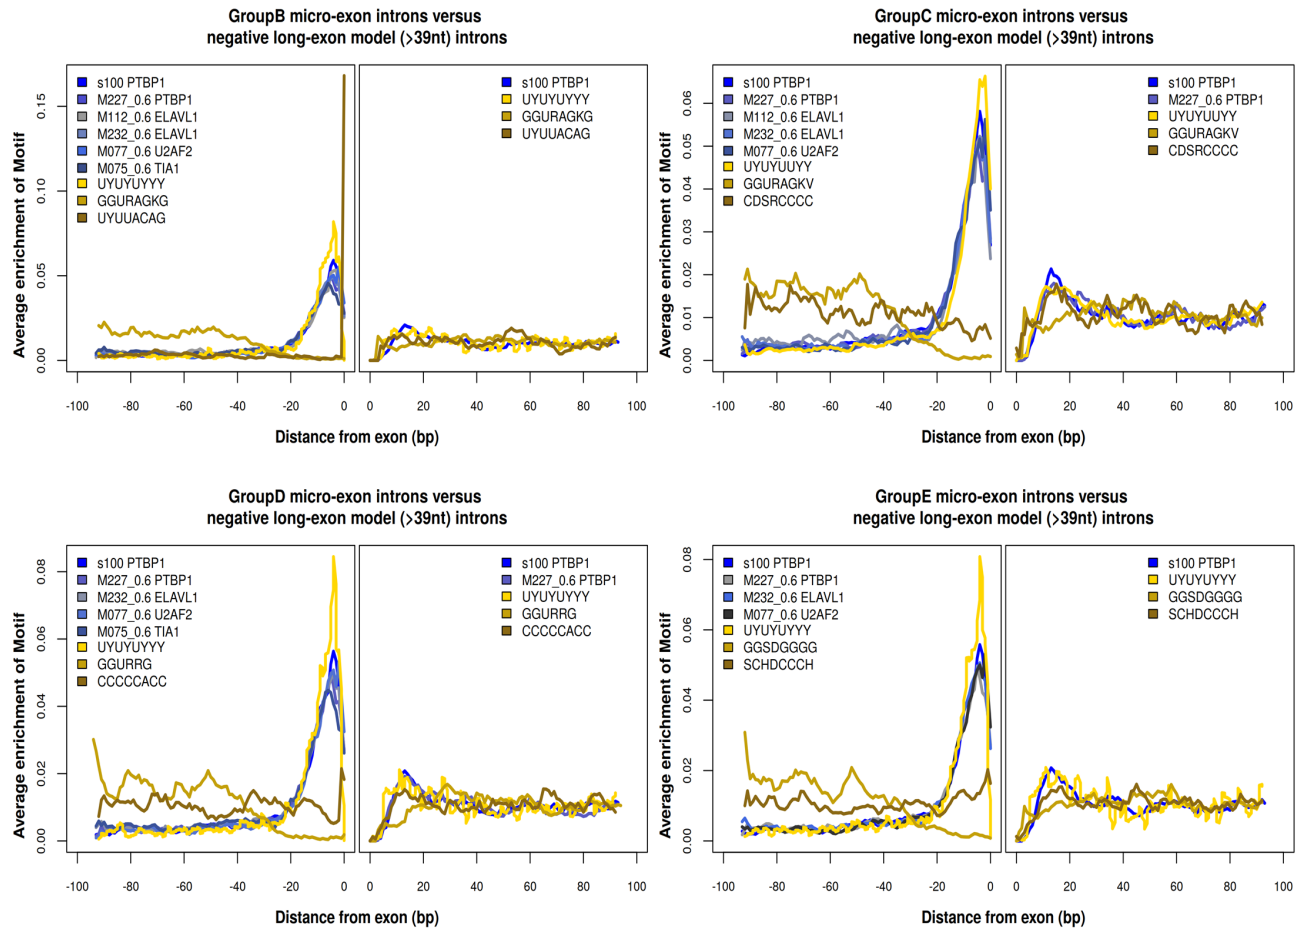

1147

1148

1149 **Supplementary Figure 6**

1150

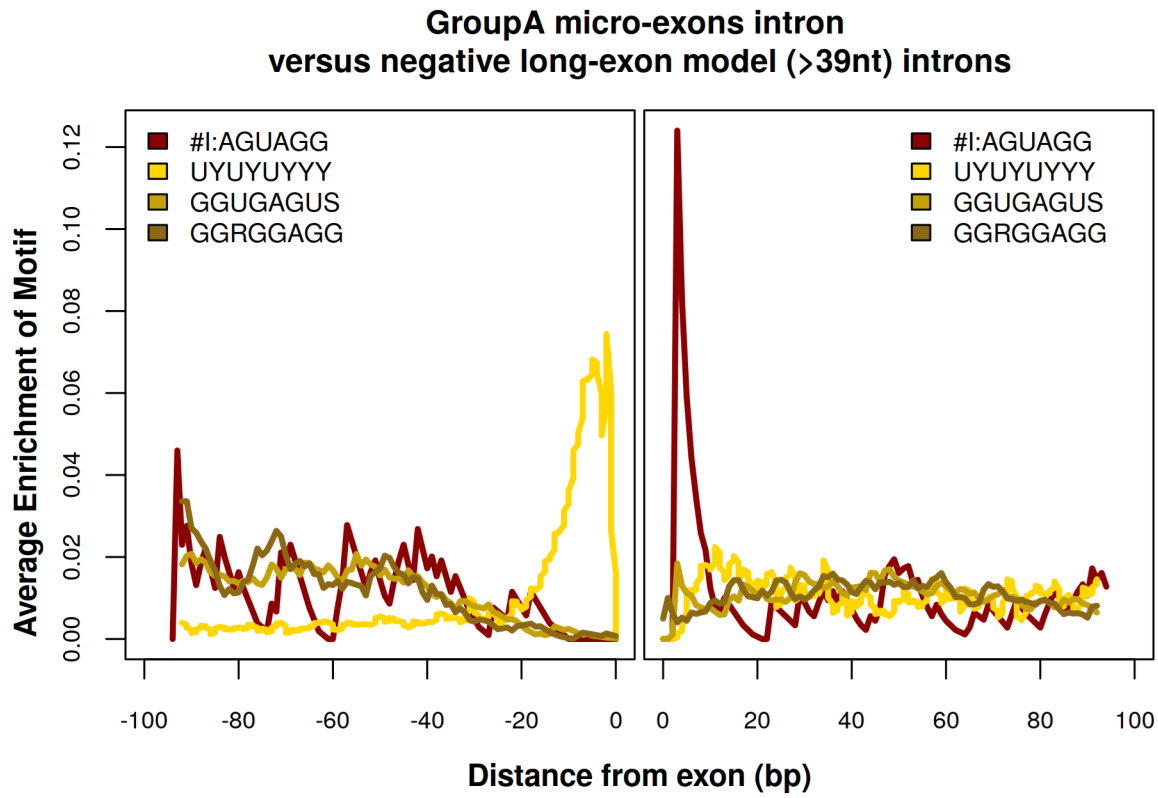

1151

1152

1153 **Supplementary Figure 7**

1154

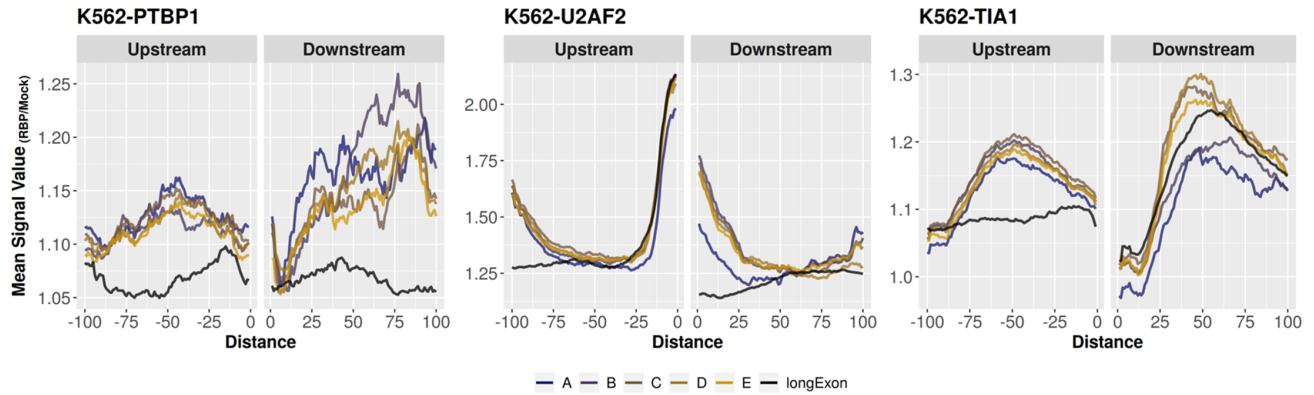

1155

1156



1157 **Supplementary Figure 8**

1158

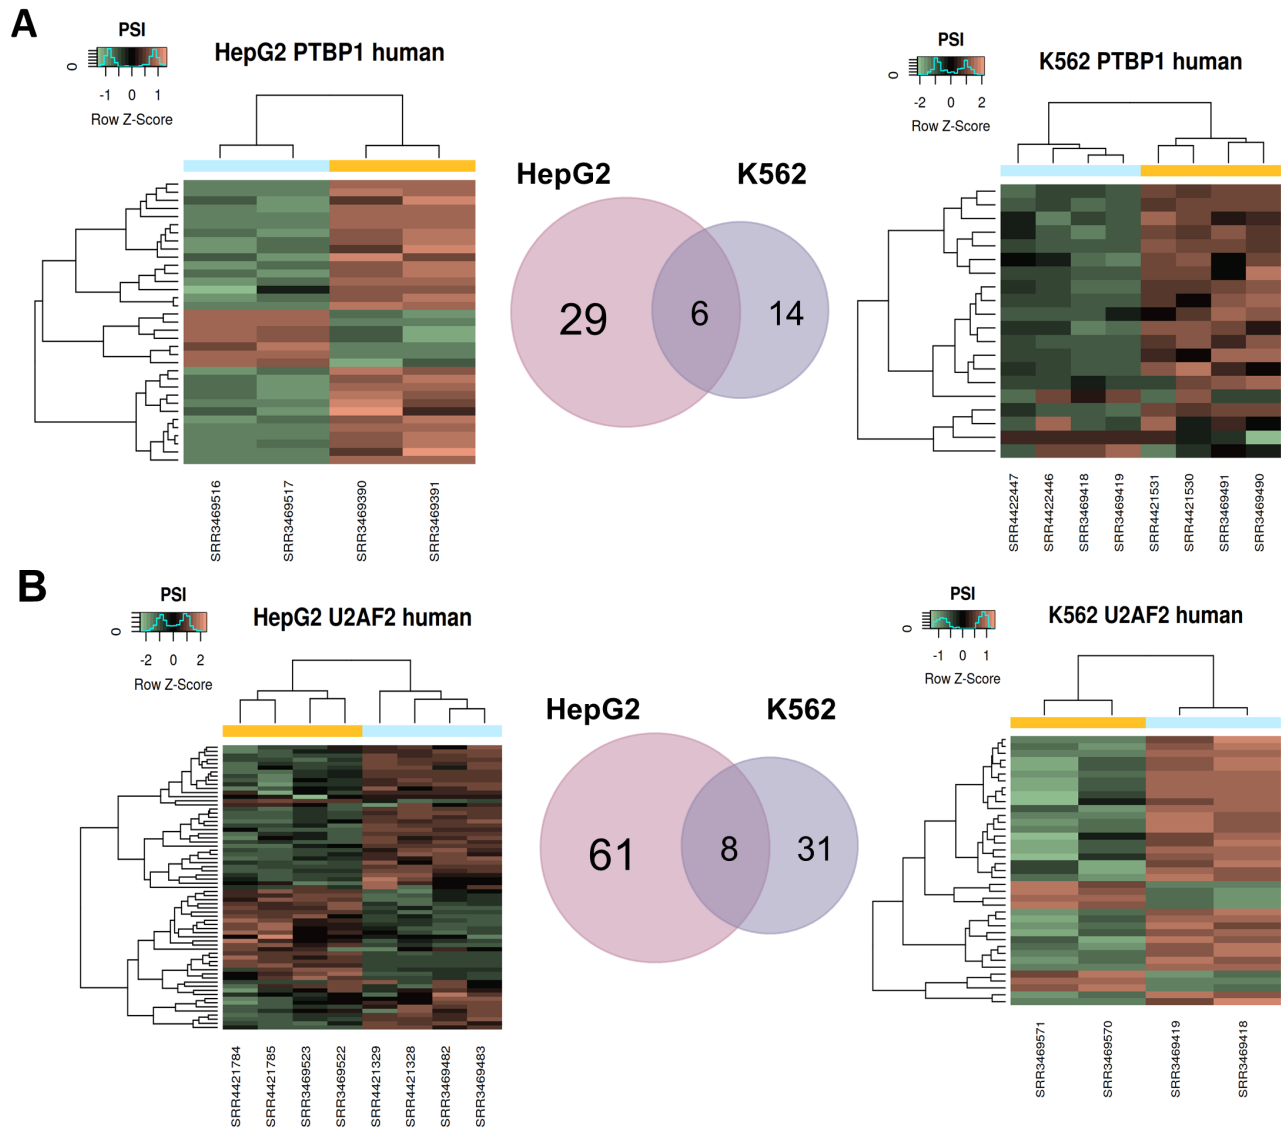

1159

1160

1161 **Supplementary Figure 9**

1162

**PTBP1 knock-down in K562 cells**

**Gene: DMD Event: HsaEX0019952**

Coordinates: chrX:31126642–31126673

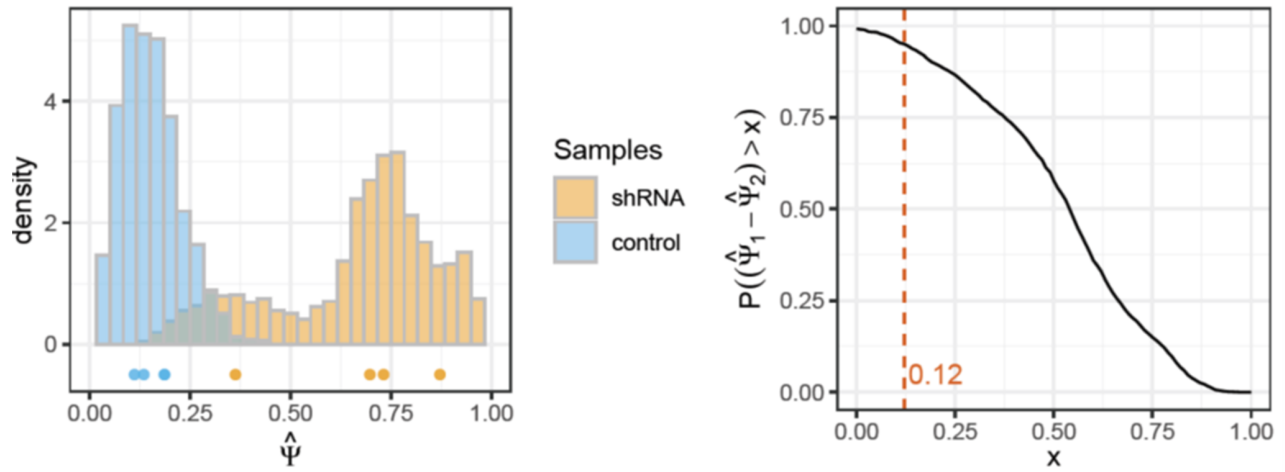

1163

1164

1165 **Supplementary Figure 10**

1166

|                                        | <b>MFASS<br/>Total</b> | <b>MFASS<br/>Micro-exon</b> | <b>CNN<br/>Top25</b> | <b>CNN<br/>Top5</b> |
|----------------------------------------|------------------------|-----------------------------|----------------------|---------------------|
| <b>Total assayed</b>                   | 27733                  | 436                         | 72                   | 13                  |
| <b><math>\Delta</math>PSI &gt; 0.1</b> | 6469 (23%)             | 133 (31%)                   | 24 (33%)             | 6 (46%)             |
| <b>SDVs</b>                            | 1050 (4%)              | 27 (6%)                     | 6 (8%)               | 2 (15%)             |

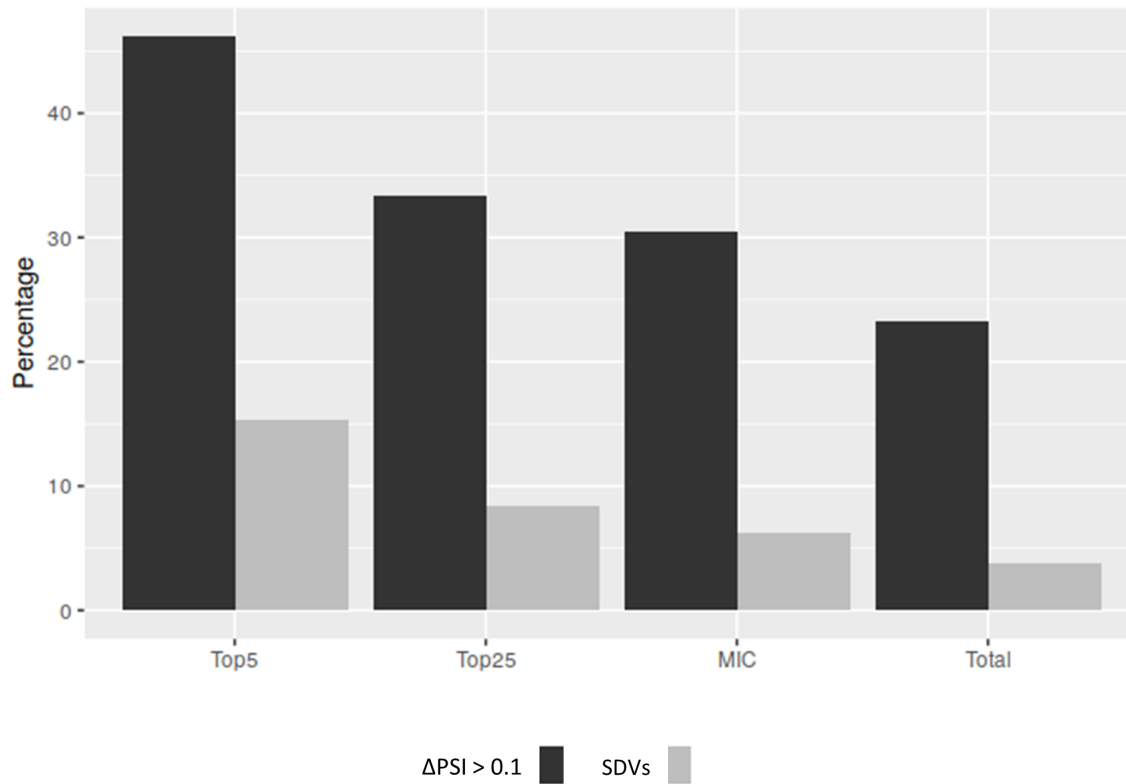

1167
